# Supplementary material for: Computational insights into CO2binding reactions by intramolecular geminal group-IV+/phosphorus- and zirconium+/group-15-based frustrated Lewis pairs
Source: Royal Society of Chemistry journal article supplement (doi:10.1039/d3cp01648j), 2023-01-01
Supplement: d3cp01648j1.pdf [file d3cp01648j1.pdf]

# Supporting Information

## Computational Insights into CO<sub>2</sub> Binding Reactions by Intramolecular Geminal Group-IV<sup>+</sup>/Phosphorus- and Zirconium<sup>+</sup>/Group-15-Based Frustrated Lewis Pairs

Chi-Shiun Wu<sup>1</sup> and Ming-Der Su<sup>1,2,a)</sup>

<sup>1</sup>Department of Applied Chemistry, National Chiayi University, Chiayi  
60004, Taiwan

<sup>2</sup>Department of Medicinal and Applied Chemistry, Kaohsiung Medical  
University, Kaohsiung 80708, Taiwan

a) E-mail: [midesu@mail.ncyu.edu.tw](mailto:midesu@mail.ncyu.edu.tw)

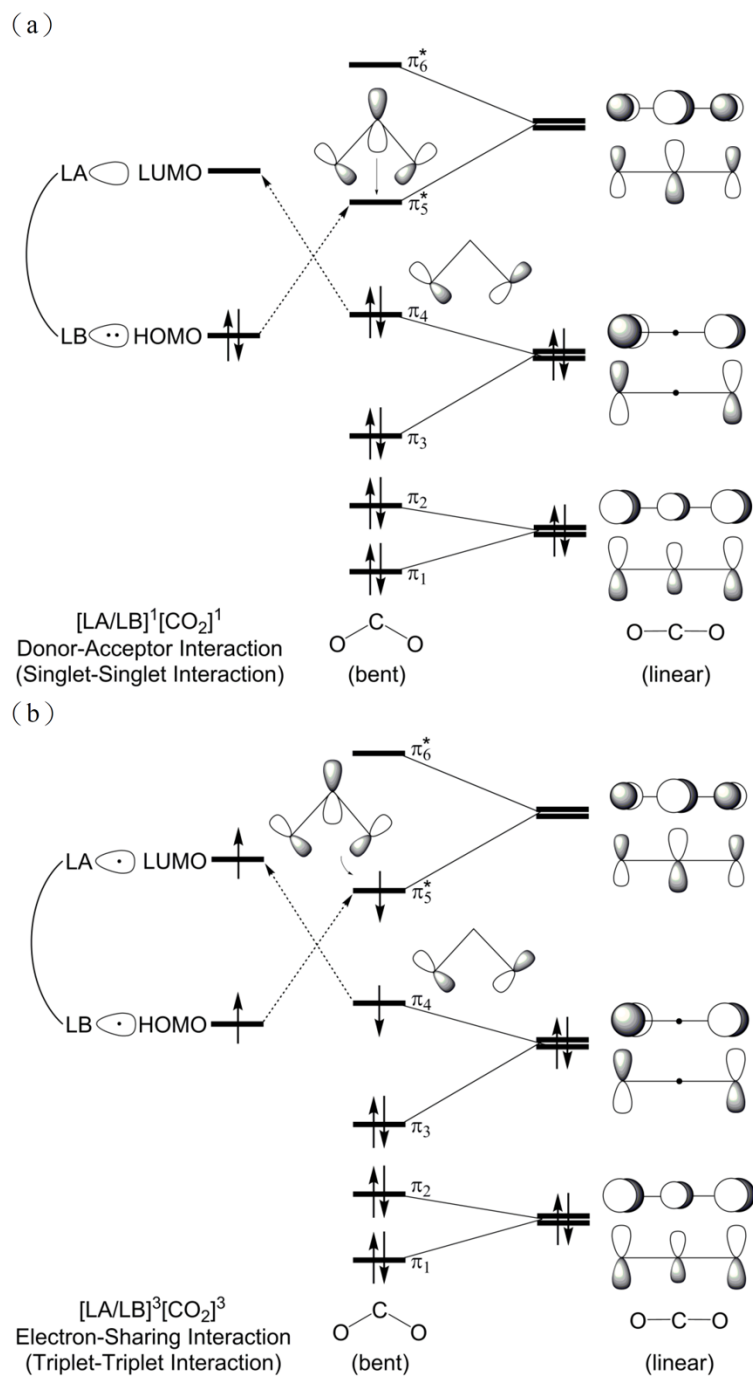

**Figure S1.** Pictorial representation of the bonding situation in (a) donor-acceptor bonding or singlet-singlet interaction and (b) electron-sharing bonding or triplet-triplet interaction.

(All geometries were calculated at the M06-2X-D3/def2-TZVP level)

**Ti<sup>+</sup>/P-Rea**

Free energy (M06-2X-D3/def2-TZVP) = -2779.136479

---

|    |             |             |             |
|----|-------------|-------------|-------------|
| Ti | -0.07657300 | 0.14803700  | 1.05071200  |
| C  | 2.07621600  | 0.40941900  | 0.09035600  |
| C  | 1.23140600  | 1.24952600  | -0.68175700 |
| C  | 0.24746900  | 0.42745400  | -1.30017000 |
| C  | 0.56563900  | -0.93604900 | -1.02115800 |
| C  | 1.70109000  | -0.94768900 | -0.16342000 |
| C  | -0.04591000 | 2.38305900  | 1.94083900  |
| C  | 0.01169900  | 1.50836700  | 3.06068100  |
| C  | -1.22238100 | 0.80348900  | 3.13282800  |
| C  | -2.02440700 | 1.21231500  | 2.02745200  |
| C  | -1.29857000 | 2.18040100  | 1.28198400  |
| C  | 2.60459900  | -2.10039400 | 0.15937700  |
| H  | 2.84488200  | -2.16057800 | 1.23010300  |
| H  | 3.55249100  | -1.96202400 | -0.38421600 |
| H  | 2.18063000  | -3.06358400 | -0.14450000 |
| C  | -0.02117700 | -2.09484000 | -1.76751200 |
| H  | -1.08506700 | -2.24535500 | -1.54103900 |
| H  | 0.50851000  | -3.02632400 | -1.53819500 |
| H  | 0.06988200  | -1.91445400 | -2.84932400 |
| C  | -0.71959900 | 0.88183600  | -2.35312400 |
| H  | -0.19351600 | 0.97422400  | -3.31755300 |
| H  | -1.15641800 | 1.86238600  | -2.12727600 |
| H  | -1.53530000 | 0.16197200  | -2.49564600 |
| C  | 1.52959700  | 2.65479100  | -1.10387400 |
| H  | 1.97147900  | 2.60543700  | -2.11239000 |
| H  | 2.25975800  | 3.14648500  | -0.45385900 |
| H  | 0.63839300  | 3.28752200  | -1.18255600 |
| C  | 3.30640500  | 0.79832400  | 0.85652400  |
| H  | 3.31799800  | 1.86421700  | 1.11494600  |
| H  | 4.20896500  | 0.59588100  | 0.25809200  |
| H  | 3.40454600  | 0.21776600  | 1.78586900  |
| C  | -1.90567400 | 3.02719300  | 0.20258500  |

|   |             |             |             |
|---|-------------|-------------|-------------|
| H | -2.53639000 | 3.80690800  | 0.65775700  |
| H | -2.55047600 | 2.44001300  | -0.46595200 |
| H | -1.15242800 | 3.53652300  | -0.40876700 |
| C | -3.48663500 | 0.92082800  | 1.91566500  |
| H | -3.71274100 | -0.13895700 | 2.09538200  |
| H | -3.89561900 | 1.20808600  | 0.94015100  |
| H | -4.02205200 | 1.50469200  | 2.68212600  |
| C | -1.80875700 | 0.06110800  | 4.29391800  |
| H | -2.29187900 | -0.87463900 | 3.98222000  |
| H | -2.59028200 | 0.69506000  | 4.74248200  |
| H | -1.07504200 | -0.17640400 | 5.07080500  |
| C | 1.10687100  | 1.55115900  | 4.08662400  |
| H | 2.08600800  | 1.26442100  | 3.67290900  |
| H | 0.88685600  | 0.89889300  | 4.93959100  |
| H | 1.21192200  | 2.57789000  | 4.46980300  |
| C | 0.87982100  | 3.55133400  | 1.78234000  |
| H | 1.93927000  | 3.26513400  | 1.77288500  |
| H | 0.73799700  | 4.21990300  | 2.64671000  |
| H | 0.66489400  | 4.13633100  | 0.88316200  |
| C | -1.43723100 | -1.45789200 | 1.14875100  |
| C | -2.60142900 | -1.88480900 | 0.61768400  |
| P | -0.10964800 | -2.13736500 | 2.13621400  |
| C | -0.10257500 | -2.44125500 | 3.94101000  |
| C | 0.20678200  | -2.96359200 | 6.67009900  |
| C | 0.90925200  | -1.81038600 | 4.67143000  |
| C | -0.91924500 | -3.38823100 | 4.57035600  |
| C | -0.77418300 | -3.63221300 | 5.93386900  |
| C | 1.06255900  | -2.06607100 | 6.03461900  |
| H | 1.58338900  | -1.11528400 | 4.16745200  |
| H | -1.65473300 | -3.95006300 | 3.99336000  |
| H | -1.42103700 | -4.36110800 | 6.42391800  |
| H | 1.85369100  | -1.56798500 | 6.59716500  |
| H | 0.31770600  | -3.16235700 | 7.73684800  |
| C | 0.36583500  | -3.80203400 | 1.53792500  |
| C | 1.17061700  | -6.35707800 | 0.72148800  |
| C | -0.29802200 | -4.44941400 | 0.49434100  |
| C | 1.42284300  | -4.45590600 | 2.19037700  |
| C | 1.82590100  | -5.72176300 | 1.77843500  |

|   |             |             |             |
|---|-------------|-------------|-------------|
| C | 0.10492700  | -5.72274100 | 0.08814600  |
| H | -1.13452800 | -3.96581900 | -0.00363200 |
| H | 1.93507400  | -3.97612500 | 3.02742000  |
| H | 2.65301500  | -6.21733200 | 2.28807700  |
| H | -0.42738000 | -6.22132000 | -0.72302900 |
| H | 1.48480600  | -7.35144300 | 0.40196500  |
| C | -3.33591300 | -3.09988500 | 1.06167500  |
| C | -4.72722800 | -5.38754400 | 1.91105200  |
| C | -3.85467700 | -4.00984900 | 0.12692100  |
| C | -3.55715900 | -3.33856600 | 2.42255800  |
| C | -4.24777600 | -4.47311600 | 2.84667900  |
| C | -4.53046800 | -5.15100200 | 0.54949800  |
| H | -3.70876600 | -3.83885100 | -0.94189200 |
| H | -3.20271600 | -2.60674300 | 3.15002800  |
| H | -4.42165300 | -4.63658800 | 3.91159000  |
| H | -4.91118400 | -5.85872800 | -0.18796900 |
| H | -5.26595700 | -6.27697400 | 2.23964100  |
| C | -3.26029300 | -1.10797300 | -0.49906800 |
| H | -2.75010200 | -0.14904700 | -0.66296400 |
| H | -4.32146800 | -0.92556900 | -0.27538200 |
| H | -3.23465200 | -1.67663100 | -1.44293400 |

-----

### Ti<sup>+</sup>/P-TS

Free energy (M06-2X-D3/def2-TZVP) = -2967.490806

|   |             |             |             |
|---|-------------|-------------|-------------|
| P | -0.09846200 | -1.87142500 | 0.84367500  |
| C | -1.85347900 | -2.38088500 | 0.65565300  |
| C | 0.76139900  | -3.43389600 | 0.38098000  |
| C | -2.56658700 | -2.27000400 | -0.54031700 |
| C | -2.47820000 | -2.95994000 | 1.76884600  |
| C | 0.14758200  | -0.49667800 | -0.38977300 |
| C | 2.06172800  | -3.63925200 | 0.86059100  |
| C | 0.13474600  | -4.46076900 | -0.33741800 |
| C | -3.88731400 | -2.71126000 | -0.62368600 |
| H | -2.07996700 | -1.82766700 | -1.40666900 |
| C | -3.79944800 | -3.39789200 | 1.68923600  |
| H | -1.92760600 | -3.07188000 | 2.70667300  |

|    |             |             |             |
|----|-------------|-------------|-------------|
| C  | 0.44963500  | -0.68749200 | -1.69558700 |
| Ti | 0.12748200  | 1.43125100  | 0.67973800  |
| C  | 2.74760600  | -4.81946400 | 0.57672600  |
| H  | 2.54523800  | -2.87949200 | 1.47938300  |
| C  | 0.81328500  | -5.64704100 | -0.60371600 |
| H  | -0.88457400 | -4.33313700 | -0.70469400 |
| C  | -4.50835000 | -3.26926600 | 0.49396800  |
| H  | -4.43306500 | -2.62076700 | -1.56467000 |
| H  | -4.27660600 | -3.84397700 | 2.56292100  |
| C  | 0.69558500  | 0.45920400  | -2.64688600 |
| C  | 0.62365600  | -1.99593100 | -2.42111100 |
| C  | 2.12396700  | -5.82518100 | -0.15976500 |
| H  | 3.76181100  | -4.96211900 | 0.95236000  |
| H  | 0.31504500  | -6.43522600 | -1.17006300 |
| H  | -5.54220400 | -3.61161500 | 0.43215400  |
| H  | 1.71711200  | 0.40018200  | -3.05443800 |
| H  | 0.02906300  | 0.38236500  | -3.52121600 |
| H  | 0.55270500  | 1.43681000  | -2.17295400 |
| C  | -0.39225100 | -2.48185200 | -3.25289300 |
| C  | 1.85099100  | -2.67236200 | -2.40588500 |
| H  | 2.65312600  | -6.75503200 | -0.37306200 |
| C  | -0.21211900 | -3.64680800 | -3.99911700 |
| H  | -1.33659900 | -1.93779900 | -3.33583400 |
| C  | 2.03901800  | -3.82641300 | -3.16156800 |
| H  | 2.66451700  | -2.30820100 | -1.77887700 |
| C  | 1.00378100  | -4.32490300 | -3.95220500 |
| H  | -1.02178600 | -4.01521800 | -4.63058200 |
| H  | 2.99887700  | -4.34358900 | -3.12376200 |
| H  | 1.14891300  | -5.23207700 | -4.54019300 |
| C  | -1.20064400 | 2.89438200  | -0.62593400 |
| C  | -0.85465300 | 3.63209400  | -1.88658700 |
| C  | -1.95205200 | 1.67252800  | -0.55507700 |
| C  | -1.19790100 | 3.48008000  | 0.67871100  |
| H  | 0.07190800  | 4.21312800  | -1.78413500 |
| H  | -1.65984600 | 4.34393300  | -2.12917800 |
| H  | -0.74485700 | 2.95774500  | -2.74475400 |
| C  | -2.50255400 | 0.93769300  | -1.73779900 |
| C  | -2.30734000 | 1.46723500  | 0.80302200  |

|   |             |             |             |
|---|-------------|-------------|-------------|
| C | -0.97373000 | 4.92158800  | 1.01492000  |
| C | -1.82144000 | 2.57749100  | 1.56057300  |
| H | -3.30408900 | 0.25709100  | -1.42717200 |
| H | -2.92902000 | 1.65925400  | -2.45015200 |
| H | -1.74798600 | 0.34342100  | -2.26571500 |
| C | -3.25099700 | 0.45429600  | 1.37508700  |
| H | -0.45975300 | 5.06273100  | 1.97393900  |
| H | -1.96566200 | 5.39156000  | 1.11379300  |
| H | -0.43395200 | 5.46575200  | 0.23505400  |
| C | -2.13528300 | 2.84886800  | 2.99957200  |
| H | -2.80941900 | -0.13389900 | 2.19219200  |
| H | -4.12200500 | 0.98052400  | 1.79500400  |
| H | -3.60800500 | -0.25811300 | 0.62522500  |
| H | -1.31281200 | 3.36234200  | 3.51501000  |
| H | -3.02072900 | 3.50162500  | 3.06680700  |
| H | -2.36770200 | 1.92735200  | 3.54769100  |
| C | 2.20174100  | 1.09395500  | 1.80651000  |
| C | 2.48571700  | 0.05728800  | 2.85083000  |
| C | 1.79769400  | 2.44381500  | 2.05297500  |
| C | 2.49641300  | 0.95982000  | 0.42641400  |
| H | 2.08617100  | -0.93110400 | 2.58108600  |
| H | 3.57486500  | -0.05134600 | 2.97177800  |
| H | 2.08480400  | 0.34555000  | 3.83222100  |
| C | 1.51390000  | 3.03368400  | 3.40202900  |
| C | 1.89504600  | 3.14895500  | 0.82643400  |
| C | 3.20317200  | -0.20203500 | -0.18734100 |
| C | 2.27032400  | 2.22729200  | -0.19010300 |
| H | 0.87619900  | 2.37776900  | 4.01132200  |
| H | 2.45181600  | 3.18836800  | 3.95761000  |
| H | 1.01679000  | 4.00926700  | 3.32029500  |
| C | 2.01523100  | 4.62888100  | 0.63900600  |
| H | 2.82248000  | -1.15886000 | 0.19032200  |
| H | 4.27670500  | -0.14055400 | 0.05411200  |
| H | 3.09988000  | -0.20776500 | -1.27852200 |
| C | 2.74078200  | 2.66024500  | -1.54847100 |
| H | 1.55723100  | 4.98013600  | -0.29366000 |
| H | 3.09112400  | 4.85961300  | 0.56956800  |
| H | 1.61447300  | 5.20699300  | 1.47624400  |

|   |             |             |             |
|---|-------------|-------------|-------------|
| H | 1.96663300  | 3.17439600  | -2.13399900 |
| H | 3.57712400  | 3.36603400  | -1.42476900 |
| H | 3.10721000  | 1.81567500  | -2.14086800 |
| C | -0.40998200 | -0.45658800 | 3.29805200  |
| O | -0.50812300 | -1.28110400 | 4.08775900  |
| O | -0.36148700 | 0.52711200  | 2.65346700  |

---

**Ti<sup>+</sup>/P-Prod**

Free energy (M06-2X-D3/def2-TZVP) = -2967.529194

---

|   |             |             |             |
|---|-------------|-------------|-------------|
| C | 0.03882600  | -0.40816300 | -0.58479100 |
| C | 0.18803900  | -0.56407600 | -1.92266600 |
| C | 0.34228800  | 0.62340400  | -2.83553200 |
| H | 1.30077700  | 0.56542400  | -3.37508800 |
| H | 0.28465400  | 1.57392000  | -2.29244000 |
| H | -0.43922700 | 0.60400100  | -3.61132600 |
| C | 0.26924300  | -1.85362800 | -2.68650400 |
| C | 0.49411800  | -4.16981300 | -4.26174600 |
| C | 1.40118600  | -2.67192500 | -2.59577900 |
| C | -0.73276000 | -2.19494500 | -3.60852200 |
| C | -0.63366500 | -3.35440700 | -4.37309300 |
| C | 1.51463200  | -3.81861100 | -3.38164600 |
| H | 2.19815500  | -2.41800700 | -1.89620600 |
| H | -1.60121000 | -1.54225200 | -3.73375100 |
| H | -1.43043700 | -3.61329500 | -5.07149200 |
| H | 2.40485600  | -4.44320700 | -3.29551300 |
| H | 0.58040000  | -5.06965000 | -4.87205100 |
| P | -0.31416700 | -1.82638300 | 0.47863600  |
| C | 0.64855700  | -3.36658400 | 0.47543500  |
| C | 2.05614400  | -5.77309700 | 0.47880600  |
| C | 1.73716000  | -3.53863400 | 1.33836400  |
| C | 0.24504000  | -4.41535800 | -0.36222400 |
| C | 0.95188600  | -5.61323500 | -0.35981100 |
| C | 2.44393500  | -4.73997000 | 1.33050600  |
| H | 2.00462200  | -2.76255800 | 2.05396600  |
| H | -0.61423600 | -4.29448200 | -1.02669400 |
| H | 0.63703700  | -6.42566600 | -1.01571500 |



|    |             |             |             |
|----|-------------|-------------|-------------|
| H  | 3.28685100  | -4.87392000 | 2.00901300  |
| H  | 2.60621400  | -6.71509500 | 0.48107700  |
| C  | -2.03230300 | -2.40698400 | 0.37152700  |
| C  | -4.64161700 | -3.37437300 | 0.28783900  |
| C  | -2.77839800 | -2.29250200 | -0.80221000 |
| C  | -2.57831400 | -3.03078500 | 1.50184200  |
| C  | -3.88713100 | -3.50330900 | 1.45582800  |
| C  | -4.08503500 | -2.77869900 | -0.84279900 |
| H  | -2.34059000 | -1.82967100 | -1.68420100 |
| H  | -1.98705100 | -3.13337300 | 2.41484200  |
| H  | -4.31948600 | -3.97754800 | 2.33752800  |
| H  | -4.66769000 | -2.69022500 | -1.76046700 |
| H  | -5.66618800 | -3.74743200 | 0.25832800  |
| Ti | 0.19887400  | 1.48102800  | 0.64907900  |
| C  | 2.52153500  | 0.95699200  | 0.16916900  |
| C  | 2.37778700  | 1.04116400  | 1.57340300  |
| C  | 2.00561600  | 2.37485800  | 1.91125200  |
| C  | 2.01420900  | 3.14022900  | 0.71259400  |
| C  | 2.26113200  | 2.25836200  | -0.37221800 |
| C  | -1.16766200 | 3.14353300  | -0.39843200 |
| C  | -1.04571100 | 3.54179300  | 0.96902900  |
| C  | -1.63993000 | 2.53660500  | 1.77008000  |
| C  | -2.21118500 | 1.56109200  | 0.90792600  |
| C  | -1.93024700 | 1.93359900  | -0.43152000 |
| C  | -2.56338600 | 1.33386000  | -1.64895100 |
| H  | -2.21533500 | 1.82184200  | -2.56679100 |
| H  | -3.65337000 | 1.47719000  | -1.59243200 |
| H  | -2.37213000 | 0.25761300  | -1.73049700 |
| C  | -3.11837200 | 0.47555700  | 1.38723600  |
| H  | -2.63720800 | -0.16162800 | 2.14401800  |
| H  | -3.48037900 | -0.15805100 | 0.56959700  |
| H  | -3.99470900 | 0.93262300  | 1.87353200  |
| C  | -1.79238500 | 2.54618200  | 3.25868400  |
| H  | -1.15843200 | 3.30866500  | 3.72854800  |
| H  | -1.53508000 | 1.56581700  | 3.68405000  |
| H  | -2.83698900 | 2.76716700  | 3.52935100  |
| C  | -0.73551100 | 4.91900200  | 1.47279600  |
| H  | -0.28639200 | 5.55730600  | 0.70652300  |

|   |             |             |             |
|---|-------------|-------------|-------------|
| H | -0.08972800 | 4.92064700  | 2.35888000  |
| H | -1.68777600 | 5.38560800  | 1.77013900  |
| C | -0.86475500 | 4.01107200  | -1.58554700 |
| H | 0.00079600  | 4.66174200  | -1.41150800 |
| H | -1.72523100 | 4.66412500  | -1.80092800 |
| H | -0.66855800 | 3.42673500  | -2.49442600 |
| C | 2.58340600  | 2.73439800  | -1.75931000 |
| H | 3.47511100  | 3.38012400  | -1.72050700 |
| H | 1.77412600  | 3.32782300  | -2.20705400 |
| H | 2.81084700  | 1.90237100  | -2.43456200 |
| C | 2.16340200  | 4.62548500  | 0.59683300  |
| H | 3.22959700  | 4.82829100  | 0.40308000  |
| H | 1.89560000  | 5.15506500  | 1.51550400  |
| H | 1.60475800  | 5.05704400  | -0.24188800 |
| C | 1.83017600  | 2.85233400  | 3.32102100  |
| H | 2.79718700  | 2.84778300  | 3.84774800  |
| H | 1.15093100  | 2.19080300  | 3.87887500  |
| H | 1.43587100  | 3.87502300  | 3.36720300  |
| C | 2.71495900  | -0.00928400 | 2.57926000  |
| H | 2.82057400  | -0.99311800 | 2.10773100  |
| H | 1.96590300  | -0.07856600 | 3.37922200  |
| H | 3.68444200  | 0.23038100  | 3.04365500  |
| C | 3.11176100  | -0.19878400 | -0.57462700 |
| H | 4.21070700  | -0.14411500 | -0.52431300 |
| H | 2.82264700  | -0.19482600 | -1.63289200 |
| H | 2.80409700  | -1.16276800 | -0.14455000 |
| C | -0.15202500 | -1.06844400 | 2.20998900  |
| O | -0.12101400 | 0.21049700  | 2.14529600  |
| O | -0.12484900 | -1.77941900 | 3.17838300  |

-----

**Zr<sup>+</sup>/P-Rea**

Free energy (M06-2X-D3/def2-TZVP) = -1976.818974

|    |             |            |             |
|----|-------------|------------|-------------|
| Zr | -0.02025300 | 0.19460200 | 1.04351000  |
| C  | 2.19941100  | 0.39640300 | -0.10468100 |
| C  | 1.34548200  | 1.28472000 | -0.81285200 |
| C  | 0.32153800  | 0.50461200 | -1.43070800 |

|   |             |             |             |
|---|-------------|-------------|-------------|
| C | 0.60821700  | -0.87458200 | -1.19348700 |
| C | 1.76813900  | -0.94343000 | -0.37020500 |
| C | -0.03710800 | 2.51214300  | 2.03209300  |
| C | -0.04623200 | 1.62682300  | 3.14910600  |
| C | -1.29651200 | 0.94390000  | 3.16259100  |
| C | -2.04855200 | 1.38725700  | 2.03488900  |
| C | -1.27734300 | 2.35661100  | 1.33424600  |
| C | 2.61105800  | -2.14700700 | -0.06185600 |
| H | 2.88818300  | -2.20603300 | 1.00007600  |
| H | 3.54395700  | -2.08506500 | -0.64391100 |
| H | 2.11125300  | -3.08556500 | -0.32703300 |
| C | -0.06802900 | -2.00419100 | -1.91174400 |
| H | -1.13315400 | -2.08643600 | -1.65436400 |
| H | 0.41097300  | -2.96296500 | -1.68245900 |
| H | 0.00318900  | -1.84438800 | -2.99839900 |
| C | -0.69434400 | 1.01269600  | -2.41323900 |
| H | -0.27974100 | 0.97305000  | -3.43369900 |
| H | -0.97479900 | 2.05511000  | -2.21569400 |
| H | -1.60808600 | 0.40242000  | -2.41420200 |
| C | 1.64180300  | 2.71660400  | -1.14061500 |
| H | 2.10526300  | 2.74899400  | -2.13970000 |
| H | 2.35033300  | 3.16911800  | -0.43893600 |
| H | 0.74329500  | 3.34320300  | -1.18706900 |
| C | 3.45040400  | 0.74464200  | 0.65152200  |
| H | 3.48754000  | 1.80857300  | 0.91908000  |
| H | 4.34202700  | 0.52780600  | 0.04214900  |
| H | 3.54867400  | 0.15499100  | 1.57596700  |
| C | -1.81350600 | 3.22088300  | 0.22933600  |
| H | -2.45705200 | 4.00755000  | 0.65312000  |
| H | -2.42692600 | 2.64959800  | -0.48148000 |
| H | -1.01707600 | 3.72230400  | -0.33268500 |
| C | -3.49681200 | 1.07360300  | 1.82054100  |
| H | -3.71911000 | 0.02135500  | 2.04510000  |
| H | -3.82195900 | 1.28794900  | 0.79479700  |
| H | -4.10875800 | 1.69333800  | 2.49597100  |
| C | -1.90461700 | 0.13149200  | 4.26569100  |
| H | -2.31219800 | -0.82034000 | 3.89725400  |
| H | -2.74116500 | 0.69932800  | 4.70192800  |

|   |             |             |             |
|---|-------------|-------------|-------------|
| H | -1.19367600 | -0.09645400 | 5.06702500  |
| C | 1.02587100  | 1.60387100  | 4.20250500  |
| H | 2.00258400  | 1.26998400  | 3.81591000  |
| H | 0.75011500  | 0.95253400  | 5.04032700  |
| H | 1.17560500  | 2.61817400  | 4.60299600  |
| C | 0.97415300  | 3.60827400  | 1.86287200  |
| H | 2.00909700  | 3.23778700  | 1.85159700  |
| H | 0.89205800  | 4.30434900  | 2.71265500  |
| H | 0.80439500  | 4.18834000  | 0.94998800  |
| C | -1.45515600 | -1.53644700 | 1.17582100  |
| C | -2.62793900 | -2.02707400 | 0.71948400  |
| P | -0.10884700 | -2.21390300 | 2.18237000  |
| C | -0.18926400 | -2.55300500 | 3.97784400  |
| C | -0.08749700 | -3.10171800 | 6.71712400  |
| C | 0.70839500  | -1.86782000 | 4.80318200  |
| C | -0.99536700 | -3.56055100 | 4.52187700  |
| C | -0.95356900 | -3.82007300 | 5.88961400  |
| C | 0.75723700  | -2.13681500 | 6.17136900  |
| H | 1.37780300  | -1.12188500 | 4.36996300  |
| H | -1.64275900 | -4.15355200 | 3.87459100  |
| H | -1.59057500 | -4.59879000 | 6.31135900  |
| H | 1.46014500  | -1.59795000 | 6.80849600  |
| H | -0.05607900 | -3.31235100 | 7.78693700  |
| C | 0.41120500  | -3.83879800 | 1.52782500  |
| C | 1.34246100  | -6.29735300 | 0.57127800  |
| C | -0.19905500 | -4.44007600 | 0.42581600  |
| C | 1.48024400  | -4.48650200 | 2.16457200  |
| C | 1.94484800  | -5.70694000 | 1.68425800  |
| C | 0.26728700  | -5.66636300 | -0.05061800 |
| H | -1.03753100 | -3.94992900 | -0.06457000 |
| H | 1.95301300  | -4.03561300 | 3.04061200  |
| H | 2.77993800  | -6.20129200 | 2.18201900  |
| H | -0.21949600 | -6.13169800 | -0.90895200 |
| H | 1.70650200  | -7.25481800 | 0.19670600  |
| C | -3.32247400 | -3.23825300 | 1.24235300  |
| C | -4.71177600 | -5.47313600 | 2.22326100  |
| C | -3.71791700 | -4.27126500 | 0.37788800  |
| C | -3.65949200 | -3.33131700 | 2.59710500  |

|   |             |             |             |
|---|-------------|-------------|-------------|
| C | -4.35332100 | -4.43919800 | 3.08491200  |
| C | -4.39052400 | -5.38673900 | 0.86731500  |
| H | -3.48115100 | -4.21251600 | -0.68715500 |
| H | -3.38970600 | -2.51584400 | 3.27070000  |
| H | -4.61842700 | -4.48930400 | 4.14228600  |
| H | -4.67336600 | -6.19068300 | 0.18668500  |
| H | -5.25104100 | -6.34155900 | 2.60328000  |
| C | -3.36347300 | -1.32967000 | -0.40131800 |
| H | -2.84359600 | -0.41102200 | -0.70735900 |
| H | -4.39250100 | -1.08424600 | -0.09873600 |
| H | -3.45001900 | -1.99202600 | -1.27771100 |

**Zr<sup>+</sup>/P-TS**

Free energy (M06-2X-D3/def2-TZVP) = -2165.186941

|    |             |             |             |
|----|-------------|-------------|-------------|
| P  | -0.12266700 | -0.16227800 | 0.20243200  |
| C  | -0.42859200 | 1.61689800  | -0.14714600 |
| C  | -1.50329100 | -0.96607200 | -0.70984600 |
| C  | 0.02432200  | 2.25423800  | -1.30705800 |
| C  | -1.18896000 | 2.34750100  | 0.77541700  |
| C  | 1.54426800  | -0.49917600 | -0.53097400 |
| C  | -2.20930200 | -0.33393200 | -1.74131600 |
| C  | -1.90022400 | -2.24541300 | -0.29944500 |
| C  | -0.25527600 | 3.60127600  | -1.53327300 |
| H  | 0.59191900  | 1.68295700  | -2.04063900 |
| C  | -1.46396300 | 3.69718100  | 0.55449800  |
| H  | -1.57555100 | 1.85926800  | 1.67370200  |
| C  | 1.78882900  | -0.85820900 | -1.81354900 |
| Zr | 3.18537200  | -0.56142300 | 1.10944200  |
| C  | -3.26545700 | -0.98761300 | -2.37113300 |
| H  | -1.93055600 | 0.66970300  | -2.06571600 |
| C  | -2.94712000 | -2.90547200 | -0.94131500 |
| H  | -1.39895000 | -2.73049000 | 0.54206300  |
| C  | -0.99147500 | 4.32774100  | -0.59646100 |
| H  | 0.10125000  | 4.08564600  | -2.44378900 |
| H  | -2.05332900 | 4.25676600  | 1.28217100  |
| C  | 3.19446700  | -1.13756600 | -2.29267600 |

|   |             |             |             |
|---|-------------|-------------|-------------|
| C | 0.80006300  | -1.05527800 | -2.92806700 |
| C | -3.62996800 | -2.27678900 | -1.98141600 |
| H | -3.80362700 | -0.48679100 | -3.17719500 |
| H | -3.24326800 | -3.90299900 | -0.61373400 |
| H | -1.20629300 | 5.38325800  | -0.76862700 |
| H | 3.45410400  | -0.47238400 | -3.13133500 |
| H | 3.95357800  | -1.00404500 | -1.50389600 |
| H | 3.27377200  | -2.16433900 | -2.68311100 |
| C | 0.66901100  | -0.08401000 | -3.92822200 |
| C | 0.08351500  | -2.25189400 | -3.05984300 |
| H | -4.45725400 | -2.78554900 | -2.47831300 |
| C | -0.20056200 | -0.27631100 | -5.00183100 |
| H | 1.26207400  | 0.83308100  | -3.87640100 |
| C | -0.77302900 | -2.45254900 | -4.13921500 |
| H | 0.17855600  | -3.02723400 | -2.29966000 |
| C | -0.92634800 | -1.46095300 | -5.10804500 |
| H | -0.29948300 | 0.49779400  | -5.76406800 |
| H | -1.33069200 | -3.38696900 | -4.21740700 |
| H | -1.60167300 | -1.61609900 | -5.95044500 |
| C | 5.21283300  | 0.71249100  | 0.34805700  |
| C | 6.30121800  | 0.18990200  | -0.54760600 |
| C | 4.09283600  | 1.50893100  | -0.06333500 |
| C | 5.27304500  | 0.75400400  | 1.77755400  |
| H | 6.81858800  | -0.67062700 | -0.10223000 |
| H | 7.05758900  | 0.97172300  | -0.71860900 |
| H | 5.92307500  | -0.11633300 | -1.53237000 |
| C | 3.78302300  | 1.94790800  | -1.46328900 |
| C | 3.43306600  | 1.96844400  | 1.10719800  |
| C | 6.44690600  | 0.41231600  | 2.64431900  |
| C | 4.15546800  | 1.48686500  | 2.24159200  |
| H | 2.75645500  | 1.69130600  | -1.75710800 |
| H | 3.89339100  | 3.04028700  | -1.53705600 |
| H | 4.47549500  | 1.49729900  | -2.18460100 |
| C | 2.31473900  | 2.96300500  | 1.17886400  |
| H | 6.15359700  | -0.07293100 | 3.58480100  |
| H | 6.95471100  | 1.35180700  | 2.91536500  |
| H | 7.18142700  | -0.21908100 | 2.13542800  |
| C | 3.89249600  | 1.85366300  | 3.67237400  |

|   |             |             |             |
|---|-------------|-------------|-------------|
| H | 1.48178400  | 2.62578300  | 1.81277700  |
| H | 2.69123800  | 3.90203600  | 1.61330000  |
| H | 1.90255900  | 3.18384000  | 0.18831600  |
| H | 4.03185700  | 1.00153000  | 4.35339900  |
| H | 4.59004800  | 2.64353100  | 3.99294500  |
| H | 2.87385100  | 2.23862800  | 3.80785300  |
| C | 3.57933200  | -2.34821700 | 2.83680300  |
| C | 3.71545200  | -2.01243900 | 4.29459800  |
| C | 2.35901000  | -2.69313200 | 2.17286900  |
| C | 4.63830200  | -2.52469400 | 1.90564000  |
| H | 2.92388800  | -1.32989000 | 4.63698100  |
| H | 3.64969300  | -2.92275000 | 4.91019200  |
| H | 4.68276800  | -1.54003900 | 4.51106800  |
| C | 1.01384800  | -2.83762600 | 2.82133500  |
| C | 2.66250500  | -3.04812600 | 0.83160900  |
| C | 6.09899700  | -2.66064700 | 2.20889200  |
| C | 4.07247400  | -2.90945500 | 0.65443700  |
| H | 0.20413400  | -2.41518200 | 2.20756800  |
| H | 0.78562700  | -3.90436900 | 2.97088500  |
| H | 0.98600000  | -2.36711000 | 3.81408700  |
| C | 1.70381300  | -3.67001800 | -0.13235600 |
| H | 6.73638500  | -2.23224400 | 1.42480600  |
| H | 6.33502800  | -3.73609800 | 2.25848800  |
| H | 6.37844200  | -2.22187100 | 3.17165500  |
| C | 4.88970600  | -3.38885000 | -0.51181000 |
| H | 0.70711600  | -3.21401900 | -0.06652000 |
| H | 1.60339700  | -4.74497200 | 0.08700800  |
| H | 2.04800500  | -3.56716800 | -1.16896800 |
| H | 5.61046100  | -2.63742700 | -0.86591500 |
| H | 5.46778300  | -4.27682300 | -0.21199400 |
| H | 4.25737300  | -3.67778900 | -1.35868000 |
| C | 0.48742400  | 0.13456500  | 2.95684700  |
| O | -0.53663100 | 0.22763800  | 3.46154300  |
| O | 1.64080300  | 0.10272400  | 2.69244100  |

-----

**Zr<sup>+</sup>/P-Pro**

Free energy (M06-2X-D3/def2-TZVP) = -2165.225858

---

|   |             |             |             |
|---|-------------|-------------|-------------|
| C | 0.02210600  | -0.51261400 | -0.59709100 |
| C | 0.20368500  | -0.65488700 | -1.93213700 |
| C | 0.34977700  | 0.55181700  | -2.82283300 |
| H | 1.31608500  | 0.52404500  | -3.35039900 |
| H | 0.26801000  | 1.49824000  | -2.26715000 |
| H | -0.42515500 | 0.53969200  | -3.60570100 |
| C | 0.32530100  | -1.94056600 | -2.69324700 |
| C | 0.61492400  | -4.28156000 | -4.21417500 |
| C | 1.46991000  | -2.73676400 | -2.56456900 |
| C | -0.65780800 | -2.31629900 | -3.62043800 |
| C | -0.52436400 | -3.48904800 | -4.36062200 |
| C | 1.61547400  | -3.89653000 | -3.32402400 |
| H | 2.24886300  | -2.45147300 | -1.85615000 |
| H | -1.53710100 | -1.68337300 | -3.76863000 |
| H | -1.30491200 | -3.77675200 | -5.06605300 |
| H | 2.51390500  | -4.50481000 | -3.21079300 |
| H | 0.72630200  | -5.19198900 | -4.80439500 |
| P | -0.32591200 | -1.92003800 | 0.46903400  |
| C | 0.61406800  | -3.46636000 | 0.40905300  |
| C | 2.06902900  | -5.83613300 | 0.25707400  |
| C | 1.82305300  | -3.58844000 | 1.10381500  |
| C | 0.12162200  | -4.54018900 | -0.34277600 |
| C | 0.85211600  | -5.72248100 | -0.41591800 |
| C | 2.55201800  | -4.77229500 | 1.01956900  |
| H | 2.17924800  | -2.77815200 | 1.74006100  |
| H | -0.82321200 | -4.45119300 | -0.88414600 |
| H | 0.46934300  | -6.55735800 | -1.00389600 |
| H | 3.49018100  | -4.86986400 | 1.56655200  |
| H | 2.63827600  | -6.76489500 | 0.19927000  |
| C | -2.06542900 | -2.42725600 | 0.38840200  |
| C | -4.71611100 | -3.26993300 | 0.31080300  |
| C | -2.80375300 | -2.28824600 | -0.78866500 |
| C | -2.64049000 | -3.01249000 | 1.52440900  |
| C | -3.97039200 | -3.42307400 | 1.48145400  |
| C | -4.13148000 | -2.71287700 | -0.82593200 |
| H | -2.34201400 | -1.85225900 | -1.67371500 |
| H | -2.05474500 | -3.13750400 | 2.43832800  |



|    |             |             |             |
|----|-------------|-------------|-------------|
| H  | -4.42607900 | -3.86758500 | 2.36686000  |
| H  | -4.70966800 | -2.60591200 | -1.74444800 |
| H  | -5.75735700 | -3.59378200 | 0.28374600  |
| Zr | 0.18091300  | 1.49633000  | 0.67282200  |
| C  | 2.65010000  | 0.99039600  | 0.22359100  |
| C  | 2.49045300  | 1.08699900  | 1.63095600  |
| C  | 2.12954500  | 2.42965400  | 1.95151500  |
| C  | 2.12409100  | 3.17868500  | 0.73959900  |
| C  | 2.39503200  | 2.28455900  | -0.33345000 |
| C  | -1.31802500 | 3.23234300  | -0.38687100 |
| C  | -1.18467600 | 3.62073000  | 0.98308000  |
| C  | -1.78156500 | 2.60993000  | 1.78405900  |
| C  | -2.34813000 | 1.63309500  | 0.91753500  |
| C  | -2.06866600 | 2.01409300  | -0.42298500 |
| C  | -2.65012200 | 1.37676600  | -1.64999200 |
| H  | -2.24709500 | 1.82600700  | -2.56598400 |
| H  | -3.74017100 | 1.52969200  | -1.66181600 |
| H  | -2.46379800 | 0.29570300  | -1.68184100 |
| C  | -3.22587600 | 0.51508900  | 1.38693500  |
| H  | -2.72168700 | -0.11530800 | 2.13471000  |
| H  | -3.55861900 | -0.12309600 | 0.55946400  |
| H  | -4.12122600 | 0.93341500  | 1.87256300  |
| C  | -1.91651400 | 2.61021200  | 3.27800800  |
| H  | -1.22844300 | 3.32537200  | 3.74791700  |
| H  | -1.71479400 | 1.61263000  | 3.69418900  |
| H  | -2.94002800 | 2.89401900  | 3.56939800  |
| C  | -0.80340900 | 4.97776400  | 1.49584200  |
| H  | -0.31825700 | 5.59132900  | 0.73026700  |
| H  | -0.14974300 | 4.93489800  | 2.37662100  |
| H  | -1.72212500 | 5.50160500  | 1.80276600  |
| C  | -0.97021400 | 4.08033100  | -1.57848800 |
| H  | -0.10705700 | 4.72946800  | -1.38232100 |
| H  | -1.81582300 | 4.73401600  | -1.84376900 |
| H  | -0.73873600 | 3.47601100  | -2.46696800 |
| C  | 2.67225400  | 2.73698800  | -1.73969800 |
| H  | 3.56848900  | 3.37713300  | -1.75121100 |
| H  | 1.84837900  | 3.32865400  | -2.16600000 |
| H  | 2.86593300  | 1.89100200  | -2.40919800 |

|   |             |             |             |
|---|-------------|-------------|-------------|
| C | 2.19295800  | 4.66916700  | 0.60001100  |
| H | 3.24302300  | 4.94385500  | 0.40887700  |
| H | 1.88007100  | 5.19362700  | 1.50822700  |
| H | 1.60749500  | 5.04887700  | -0.24700400 |
| C | 1.94787100  | 2.94117800  | 3.35181100  |
| H | 2.91740100  | 2.98969300  | 3.87157900  |
| H | 1.29688000  | 2.27932300  | 3.94280600  |
| H | 1.51690800  | 3.95031000  | 3.36674300  |
| C | 2.78290200  | 0.03085100  | 2.65079400  |
| H | 2.87413900  | -0.95956400 | 2.18828200  |
| H | 2.01044700  | -0.02440500 | 3.43000500  |
| H | 3.74422200  | 0.24536600  | 3.14277400  |
| C | 3.20123400  | -0.19015400 | -0.51669500 |
| H | 4.30184300  | -0.17012000 | -0.48854400 |
| H | 2.89209800  | -0.19007000 | -1.57016800 |
| H | 2.87282300  | -1.14185800 | -0.07443200 |
| C | -0.11423300 | -1.19934800 | 2.21750100  |
| O | -0.16338200 | 0.08879200  | 2.19741600  |
| O | 0.00040900  | -1.93553400 | 3.15624700  |

---

### Hf<sup>+</sup>/P-Rea

Free energy (M06-2X-D3/def2-TZVP) = -1977.779112

---

|    |             |             |             |
|----|-------------|-------------|-------------|
| Hf | -0.03287300 | 0.19407400  | 1.02827000  |
| C  | 2.20335500  | 0.39918800  | -0.10325700 |
| C  | 1.35482900  | 1.29416300  | -0.81109500 |
| C  | 0.33009400  | 0.52074500  | -1.43639000 |
| C  | 0.61639400  | -0.86170900 | -1.20988600 |
| C  | 1.77262300  | -0.93838900 | -0.38352000 |
| C  | -0.02809500 | 2.51383300  | 2.03084600  |
| C  | -0.04352100 | 1.62278100  | 3.14352000  |
| C  | -1.29981800 | 0.94918300  | 3.15352700  |
| C  | -2.04656200 | 1.40107200  | 2.02595200  |
| C  | -1.26793000 | 2.36837300  | 1.32947500  |
| C  | 2.61066100  | -2.14478100 | -0.07359900 |
| H  | 2.87078300  | -2.21332400 | 0.99211000  |
| H  | 3.55269900  | -2.07801100 | -0.64005300 |

|   |             |             |             |
|---|-------------|-------------|-------------|
| H | 2.11460700  | -3.08066000 | -0.35498000 |
| C | -0.06752200 | -1.98231600 | -1.93450400 |
| H | -1.13159800 | -2.06278800 | -1.67090400 |
| H | 0.41018700  | -2.94450100 | -1.71733100 |
| H | -0.00303000 | -1.81252600 | -3.02001900 |
| C | -0.68522400 | 1.03433100  | -2.41699900 |
| H | -0.29047200 | 0.95500100  | -3.44288000 |
| H | -0.92940600 | 2.08962100  | -2.24151500 |
| H | -1.61834500 | 0.45427700  | -2.38711400 |
| C | 1.65697500  | 2.72679900  | -1.12937200 |
| H | 2.11738700  | 2.76367100  | -2.12965300 |
| H | 2.37017000  | 3.17005700  | -0.42664300 |
| H | 0.76190600  | 3.35870100  | -1.16813500 |
| C | 3.45290600  | 0.73938000  | 0.65933800  |
| H | 3.48914700  | 1.80049100  | 0.93793500  |
| H | 4.34652100  | 0.52863200  | 0.05082400  |
| H | 3.54757400  | 0.14127000  | 1.57865000  |
| C | -1.79853300 | 3.23754500  | 0.22544300  |
| H | -2.45543800 | 4.01399200  | 0.64731800  |
| H | -2.39642500 | 2.66654100  | -0.49878700 |
| H | -0.99959500 | 3.75139900  | -0.32143300 |
| C | -3.49258500 | 1.08795600  | 1.79650400  |
| H | -3.71938400 | 0.03973800  | 2.03470400  |
| H | -3.80133400 | 1.28452400  | 0.76194100  |
| H | -4.11436200 | 1.72014800  | 2.45098100  |
| C | -1.91179600 | 0.13448300  | 4.25286500  |
| H | -2.31687200 | -0.81755200 | 3.88258100  |
| H | -2.74940500 | 0.70088900  | 4.68869500  |
| H | -1.20242300 | -0.09422400 | 5.05541100  |
| C | 1.02601300  | 1.59151400  | 4.19946600  |
| H | 2.00266300  | 1.25760500  | 3.81295900  |
| H | 0.74658900  | 0.93567300  | 5.03251900  |
| H | 1.17655500  | 2.60278500  | 4.60720600  |
| C | 0.98949800  | 3.60531100  | 1.87096600  |
| H | 2.02232300  | 3.22917500  | 1.85842600  |
| H | 0.90989000  | 4.29506200  | 2.72610400  |
| H | 0.82424100  | 4.19346400  | 0.96255800  |
| C | -1.46563200 | -1.52932700 | 1.15400200  |

|   |             |             |             |
|---|-------------|-------------|-------------|
| C | -2.63864500 | -2.04473900 | 0.72565100  |
| P | -0.11115700 | -2.20649800 | 2.17606800  |
| C | -0.20360300 | -2.55997300 | 3.96725300  |
| C | -0.12122800 | -3.12935700 | 6.70224900  |
| C | 0.69037500  | -1.88269400 | 4.80320100  |
| C | -1.01548900 | -3.56999800 | 4.49774300  |
| C | -0.98363400 | -3.83943400 | 5.86378200  |
| C | 0.72964200  | -2.16250300 | 6.16950200  |
| H | 1.36451200  | -1.13570600 | 4.37921500  |
| H | -1.66002800 | -4.15622600 | 3.84171300  |
| H | -1.62544800 | -4.61964300 | 6.27538900  |
| H | 1.42970300  | -1.63047000 | 6.81541500  |
| H | -0.09739100 | -3.34802600 | 7.77065300  |
| C | 0.41311400  | -3.82709200 | 1.51411900  |
| C | 1.35137300  | -6.27773300 | 0.54425800  |
| C | -0.18489900 | -4.41647500 | 0.39925900  |
| C | 1.47367000  | -4.48284600 | 2.15690800  |
| C | 1.94203700  | -5.69905800 | 1.66969600  |
| C | 0.28441300  | -5.63900500 | -0.08376800 |
| H | -1.01541600 | -3.91839200 | -0.09638400 |
| H | 1.93724400  | -4.04130100 | 3.04250800  |
| H | 2.77073700  | -6.19955800 | 2.17195100  |
| H | -0.19276900 | -6.09496500 | -0.95251000 |
| H | 1.71832300  | -7.23205900 | 0.16454300  |
| C | -3.31539600 | -3.25413400 | 1.27738900  |
| C | -4.69265700 | -5.47607600 | 2.30351000  |
| C | -3.66551400 | -4.32715400 | 0.44281300  |
| C | -3.69250200 | -3.30074000 | 2.62395600  |
| C | -4.38077700 | -4.40236200 | 3.13386100  |
| C | -4.33130200 | -5.43622000 | 0.95543100  |
| H | -3.40058500 | -4.30295200 | -0.61702100 |
| H | -3.45763200 | -2.45605600 | 3.27424600  |
| H | -4.67686100 | -4.41652100 | 4.18403600  |
| H | -4.57831300 | -6.27129200 | 0.29876400  |
| H | -5.22708100 | -6.33961800 | 2.70110200  |
| C | -3.40053000 | -1.37755800 | -0.39571200 |
| H | -2.89557900 | -0.46195200 | -0.73388700 |
| H | -4.42568000 | -1.13380900 | -0.07827400 |

H -3.49867000 -2.06269900 -1.25334100

---

**Hf<sup>+</sup>/P-TS**

Free energy (M06-2X-D3/def2-TZVP) = -2166.148423

---

|    |             |             |             |
|----|-------------|-------------|-------------|
| Hf | 3.17182700  | -0.55605800 | 1.11005400  |
| C  | 1.56148300  | -0.50292600 | -0.55042100 |
| C  | 1.79814000  | -0.85955400 | -1.83568200 |
| P  | -0.10649600 | -0.17422900 | 0.19147300  |
| C  | 3.19845500  | -1.13879300 | -2.32941800 |
| C  | 0.80002100  | -1.05614000 | -2.94201100 |
| C  | -0.41732700 | 1.60598600  | -0.15012600 |
| C  | -1.49152800 | -0.97422200 | -0.71825000 |
| H  | 3.44845300  | -0.47303600 | -3.17059000 |
| H  | 3.96491600  | -1.00861200 | -1.54811200 |
| H  | 3.27081100  | -2.16497200 | -2.72300400 |
| C  | 0.65709200  | -0.08216800 | -3.93777100 |
| C  | 0.08791900  | -2.25559600 | -3.07237000 |
| C  | 0.03284100  | 2.24989600  | -1.30749100 |
| C  | -1.18069000 | 2.33024800  | 0.77509600  |
| C  | -2.19888600 | -0.33918000 | -1.74706400 |
| C  | -1.89282800 | -2.25164400 | -0.30618600 |
| C  | -0.21991900 | -0.27477500 | -5.00531900 |
| H  | 1.24705200  | 0.83697300  | -3.88782900 |
| C  | -0.77603000 | -2.45642500 | -4.14576500 |
| H  | 0.19265400  | -3.03317900 | -2.31571000 |
| C  | -0.25206700 | 3.59672100  | -1.52845600 |
| H  | 0.60241900  | 1.68361600  | -2.04337600 |
| C  | -1.46099800 | 3.67968400  | 0.55970000  |
| H  | -1.56649100 | 1.83665800  | 1.67081900  |
| C  | -3.26010700 | -0.98828900 | -2.37296500 |
| H  | -1.91717700 | 0.66324500  | -2.07259300 |
| C  | -2.94477000 | -2.90737900 | -0.94434600 |
| H  | -1.39110200 | -2.73864200 | 0.53386200  |
| C  | -0.94115400 | -1.46227600 | -5.11006000 |
| H  | -0.32787900 | 0.50134200  | -5.76428200 |
| H  | -1.33006600 | -3.39308700 | -4.22290600 |

|   |             |             |             |
|---|-------------|-------------|-------------|
| C | -0.99092100 | 4.31667500  | -0.58876000 |
| H | 0.10242700  | 4.08601200  | -2.43713200 |
| H | -2.05284000 | 4.23405400  | 1.28936700  |
| C | -3.62862400 | -2.27599300 | -1.98205100 |
| H | -3.79900600 | -0.48511200 | -3.17707800 |
| H | -3.24391300 | -3.90361200 | -0.61555400 |
| H | -1.62207500 | -1.61771000 | -5.94789300 |
| H | -1.20990000 | 5.37200200  | -0.75677800 |
| H | -4.45977400 | -2.78129100 | -2.47602300 |
| C | 5.21014600  | 0.70970800  | 0.35423000  |
| C | 6.30066000  | 0.18693400  | -0.53907300 |
| C | 4.09391400  | 1.51021200  | -0.05923700 |
| C | 5.26968300  | 0.75633800  | 1.78441700  |
| H | 5.92488200  | -0.11940500 | -1.52466900 |
| H | 7.05768300  | 0.96844200  | -0.70847900 |
| H | 6.81674800  | -0.67396200 | -0.09308900 |
| C | 3.78616900  | 1.94585200  | -1.46048800 |
| C | 3.43513200  | 1.97692900  | 1.11037800  |
| C | 6.44094000  | 0.41239300  | 2.65391900  |
| C | 4.15643700  | 1.49760400  | 2.24566000  |
| H | 2.75628500  | 1.69937800  | -1.75088400 |
| H | 3.90927300  | 3.03647500  | -1.53995100 |
| H | 4.47169600  | 1.48366800  | -2.18106500 |
| C | 2.31883300  | 2.97483000  | 1.17760400  |
| H | 6.14524300  | -0.07573300 | 3.59222600  |
| H | 6.94842900  | 1.35084300  | 2.92901100  |
| H | 7.17661800  | -0.21776900 | 2.14525200  |
| C | 3.89591600  | 1.86869500  | 3.67590500  |
| H | 1.48414000  | 2.64384100  | 1.81302100  |
| H | 2.69632900  | 3.91622700  | 1.60585900  |
| H | 1.90661800  | 3.19031000  | 0.18589700  |
| H | 4.02205400  | 1.01519400  | 4.35797900  |
| H | 4.60284200  | 2.64936300  | 3.99820200  |
| H | 2.88249100  | 2.26819400  | 3.80951700  |
| C | 3.57318600  | -2.34922200 | 2.84270900  |
| C | 3.71292900  | -2.01687300 | 4.30107800  |
| C | 2.35215400  | -2.69509100 | 2.17974000  |
| C | 4.63120100  | -2.52107500 | 1.90968800  |

|   |             |             |             |
|---|-------------|-------------|-------------|
| H | 2.91949900  | -1.33975900 | 4.65005400  |
| H | 3.65545100  | -2.92885500 | 4.91495300  |
| H | 4.67804400  | -1.53861900 | 4.51446100  |
| C | 1.00721500  | -2.83920300 | 2.82988900  |
| C | 2.65546400  | -3.04732200 | 0.83759800  |
| C | 6.09208400  | -2.65774400 | 2.21143100  |
| C | 4.06482600  | -2.90264800 | 0.65713900  |
| H | 0.19738900  | -2.40970500 | 2.22096100  |
| H | 0.77433700  | -3.90542500 | 2.97541000  |
| H | 0.98388300  | -2.37474400 | 3.82590500  |
| C | 1.69756100  | -3.66523300 | -0.12943500 |
| H | 6.72913700  | -2.22571100 | 1.42917400  |
| H | 6.32832400  | -3.73335300 | 2.25595600  |
| H | 6.37180700  | -2.22321800 | 3.17602700  |
| C | 4.88133500  | -3.38094200 | -0.51028400 |
| H | 0.70242500  | -3.20530000 | -0.06867000 |
| H | 1.59167300  | -4.73968500 | 0.08961500  |
| H | 2.04717600  | -3.56395900 | -1.16435200 |
| H | 5.61062400  | -2.63388200 | -0.85583900 |
| H | 5.44927800  | -4.27754900 | -0.21670600 |
| H | 4.24905100  | -3.65578900 | -1.36182100 |
| C | 0.51701500  | 0.14394700  | 2.99105200  |
| O | -0.50996400 | 0.24377900  | 3.48414400  |
| O | 1.66441700  | 0.10217600  | 2.70698800  |

-----

### Hf<sup>+</sup>/P-Prod

Free energy (M06-2X-D3/def2-TZVP) = -2166.190301

|   |             |             |             |
|---|-------------|-------------|-------------|
| C | 0.02190000  | -0.50620800 | -0.60128900 |
| C | 0.20255500  | -0.65311800 | -1.93646700 |
| C | 0.35039900  | 0.54921700  | -2.83230300 |
| H | 1.31622100  | 0.51573000  | -3.36034200 |
| H | 0.27181800  | 1.49940300  | -2.28275000 |
| H | -0.42516200 | 0.53409300  | -3.61446700 |
| C | 0.32238400  | -1.94165800 | -2.69286600 |
| C | 0.61100800  | -4.28675400 | -4.20734600 |
| C | 1.46788300  | -2.73658400 | -2.56376800 |

|    |             |             |             |
|----|-------------|-------------|-------------|
| C  | -0.66183200 | -2.32034200 | -3.61764900 |
| C  | -0.52891100 | -3.49529400 | -4.35443500 |
| C  | 1.61286800  | -3.89845300 | -3.32007300 |
| H  | 2.24799600  | -2.44827000 | -1.85790100 |
| H  | -1.54133900 | -1.68803700 | -3.76695500 |
| H  | -1.31028600 | -3.78535400 | -5.05797200 |
| H  | 2.51201700  | -4.50564900 | -3.20677700 |
| H  | 0.72201100  | -5.19879700 | -4.79514000 |
| P  | -0.32736200 | -1.91600400 | 0.46485400  |
| C  | 0.61483400  | -3.46048300 | 0.40713300  |
| C  | 2.07263500  | -5.82838300 | 0.26011200  |
| C  | 1.82641200  | -3.57755800 | 1.09825500  |
| C  | 0.12107600  | -4.53805000 | -0.33841300 |
| C  | 0.85317900  | -5.71951700 | -0.40904800 |
| C  | 2.55681700  | -4.76060500 | 1.01645000  |
| H  | 2.18356600  | -2.76361000 | 1.72927400  |
| H  | -0.82581400 | -4.45274800 | -0.87674600 |
| H  | 0.46962800  | -6.55750200 | -0.99207700 |
| H  | 3.49707000  | -4.85450400 | 1.56049000  |
| H  | 2.64309300  | -6.75652100 | 0.20424500  |
| C  | -2.06618800 | -2.42439100 | 0.38431100  |
| C  | -4.71562500 | -3.27027100 | 0.30657700  |
| C  | -2.80537600 | -2.28358800 | -0.79196800 |
| C  | -2.63969200 | -3.01275400 | 1.51960200  |
| C  | -3.96905400 | -3.42489000 | 1.47652700  |
| C  | -4.13251300 | -2.70995600 | -0.82932300 |
| H  | -2.34497100 | -1.84461700 | -1.67612100 |
| H  | -2.05342800 | -3.13893500 | 2.43300100  |
| H  | -4.42369800 | -3.87172800 | 2.36129300  |
| H  | -4.71148000 | -2.60153600 | -1.74716600 |
| H  | -5.75647900 | -3.59537100 | 0.27950500  |
| Hf | 0.17918600  | 1.48687400  | 0.67222900  |
| C  | 2.65676300  | 0.98795400  | 0.22544800  |
| C  | 2.49842000  | 1.08384700  | 1.63303200  |
| C  | 2.13223800  | 2.42537100  | 1.95392500  |
| C  | 2.12438000  | 3.17455700  | 0.74182900  |
| C  | 2.39631000  | 2.28118900  | -0.33220200 |
| C  | -1.31958600 | 3.23349500  | -0.38584700 |



|   |             |             |             |
|---|-------------|-------------|-------------|
| C | -1.18611400 | 3.61945400  | 0.98522500  |
| C | -1.78568500 | 2.60890100  | 1.78506700  |
| C | -2.35449000 | 1.63467400  | 0.91698000  |
| C | -2.07239700 | 2.01640600  | -0.42321500 |
| C | -2.65104400 | 1.37915000  | -1.65149700 |
| H | -2.24574400 | 1.82862000  | -2.56645000 |
| H | -3.74114900 | 1.53105100  | -1.66687300 |
| H | -2.46366200 | 0.29822100  | -1.68325500 |
| C | -3.23399700 | 0.51668000  | 1.38414400  |
| H | -2.73290600 | -0.11518300 | 2.13297600  |
| H | -3.56477500 | -0.12087900 | 0.55540700  |
| H | -4.13076100 | 0.93432700  | 1.86769300  |
| C | -1.92209400 | 2.61009300  | 3.27917400  |
| H | -1.22759300 | 3.31896400  | 3.74928500  |
| H | -1.72882000 | 1.61135000  | 3.69661200  |
| H | -2.94296000 | 2.90305100  | 3.57072500  |
| C | -0.80293900 | 4.97494000  | 1.50067600  |
| H | -0.31955100 | 5.59007200  | 0.73525300  |
| H | -0.14659500 | 4.92969900  | 2.37937800  |
| H | -1.72035800 | 5.49862400  | 1.81159300  |
| C | -0.97194600 | 4.08337400  | -1.57636300 |
| H | -0.10757700 | 4.73081600  | -1.38004600 |
| H | -1.81663800 | 4.73865200  | -1.84055700 |
| H | -0.74139000 | 3.48028900  | -2.46596300 |
| C | 2.67370000  | 2.73481100  | -1.73815700 |
| H | 3.57558800  | 3.36699900  | -1.75185600 |
| H | 1.85353800  | 3.33447400  | -2.16048900 |
| H | 2.85779400  | 1.88880100  | -2.41043300 |
| C | 2.19147200  | 4.66509300  | 0.60225000  |
| H | 3.24055700  | 4.94084100  | 0.40742100  |
| H | 1.88126400  | 5.18885500  | 1.51177400  |
| H | 1.60245900  | 5.04472200  | -0.24229600 |
| C | 1.95173000  | 2.93732000  | 3.35448600  |
| H | 2.92161400  | 2.98895500  | 3.87322200  |
| H | 1.30258800  | 2.27535300  | 3.94747400  |
| H | 1.51803400  | 3.94526400  | 3.36878500  |
| C | 2.79336800  | 0.02849500  | 2.65349700  |
| H | 2.90655200  | -0.95867100 | 2.18847000  |

|   |             |             |             |
|---|-------------|-------------|-------------|
| H | 2.01276400  | -0.04173100 | 3.42370500  |
| H | 3.74487000  | 0.25545700  | 3.15886900  |
| C | 3.20511800  | -0.19189900 | -0.51791900 |
| H | 4.30582700  | -0.17183000 | -0.49637100 |
| H | 2.89043000  | -0.19090200 | -1.56980900 |
| H | 2.87993200  | -1.14452700 | -0.07515900 |
| C | -0.11606900 | -1.19657200 | 2.21378200  |
| O | -0.16090900 | 0.09380400  | 2.19824400  |
| O | -0.00409400 | -1.93283600 | 3.15186700  |

-----

**Zr<sup>+</sup>/N-Rea**

Free energy (M06-2X-D3/def2-TZVP) = -1690.24841

-----

|    |             |             |             |
|----|-------------|-------------|-------------|
| Zr | -0.13429800 | 0.08785500  | 1.22439400  |
| C  | 2.19827600  | 0.45426400  | 0.38079400  |
| C  | 1.36457400  | 1.22530800  | -0.48027300 |
| C  | 0.51642900  | 0.32968000  | -1.19230600 |
| C  | 0.88476000  | -1.00764400 | -0.83914900 |
| C  | 1.92458500  | -0.93092200 | 0.12064700  |
| C  | -0.42283500 | 2.48039700  | 2.09796800  |
| C  | -0.24029000 | 1.64623600  | 3.23290400  |
| C  | -1.38754100 | 0.79108400  | 3.33986700  |
| C  | -2.25264600 | 1.08714400  | 2.26265900  |
| C  | -1.63576800 | 2.09804200  | 1.45100500  |
| C  | 2.70951900  | -2.11110100 | 0.62013800  |
| H  | 3.36814000  | -1.84443100 | 1.45702000  |
| H  | 3.34843400  | -2.48824600 | -0.19269100 |
| H  | 2.06271100  | -2.94186200 | 0.94093900  |
| C  | 0.43551700  | -2.26406700 | -1.51952400 |
| H  | -0.64603000 | -2.28270700 | -1.70327100 |
| H  | 0.68492200  | -3.15044700 | -0.92346800 |
| H  | 0.94058600  | -2.35339000 | -2.49441100 |
| C  | -0.40303700 | 0.73044100  | -2.31102100 |
| H  | 0.18723400  | 1.07362500  | -3.17496900 |
| H  | -1.07546300 | 1.55417900  | -2.03041300 |
| H  | -1.01714300 | -0.11402000 | -2.64773400 |
| C  | 1.53179100  | 2.66683300  | -0.85092000 |

|   |             |             |             |
|---|-------------|-------------|-------------|
| H | 2.07381600  | 2.71135200  | -1.80930200 |
| H | 2.11914900  | 3.22887600  | -0.11809900 |
| H | 0.57207900  | 3.17745700  | -1.00333900 |
| C | 3.29667700  | 0.97751900  | 1.26405000  |
| H | 3.11477800  | 2.01859700  | 1.56330200  |
| H | 4.26490700  | 0.94825400  | 0.74101400  |
| H | 3.40958400  | 0.37836300  | 2.18041300  |
| C | -2.28815100 | 2.80117400  | 0.29403300  |
| H | -2.98986300 | 3.56813400  | 0.65683700  |
| H | -2.86406600 | 2.10986300  | -0.33872200 |
| H | -1.55121800 | 3.30842600  | -0.34305900 |
| C | -3.65710100 | 0.57474900  | 2.16152500  |
| H | -3.70875300 | -0.52422500 | 2.17554900  |
| H | -4.16472700 | 0.94403100  | 1.26243200  |
| H | -4.22633400 | 0.93695600  | 3.03161500  |
| C | -1.75297600 | -0.11807800 | 4.47195000  |
| H | -2.24057700 | -1.03320100 | 4.10523300  |
| H | -2.46598300 | 0.39312200  | 5.13843900  |
| H | -0.88113600 | -0.40966500 | 5.07006700  |
| C | 0.81065100  | 1.89287300  | 4.27780900  |
| H | 1.83485100  | 1.82586800  | 3.88013400  |
| H | 0.71772400  | 1.19154600  | 5.11435200  |
| H | 0.68965800  | 2.91084700  | 4.68011500  |
| C | 0.37479300  | 3.72769700  | 1.86850400  |
| H | 1.45713500  | 3.56165100  | 1.95316700  |
| H | 0.10301300  | 4.45583700  | 2.65008100  |
| H | 0.16380600  | 4.19583500  | 0.90200200  |
| C | -1.08012600 | -1.97238000 | 1.38252800  |
| C | -2.27198000 | -2.08887200 | 0.74204000  |
| N | -0.49561300 | -3.00290500 | 2.17000700  |
| C | 0.12091200  | -2.57050200 | 3.36861700  |
| C | 1.40756100  | -1.78391500 | 5.74624800  |
| C | 1.07553300  | -1.54464900 | 3.36601700  |
| C | -0.20215500 | -3.17977200 | 4.58971200  |
| C | 0.43579900  | -2.79136100 | 5.76194500  |
| C | 1.72519400  | -1.16163900 | 4.54441400  |
| H | 1.47461300  | -1.17911700 | 2.40925800  |
| H | -0.94296200 | -3.98125700 | 4.59635700  |

|   |             |             |             |
|---|-------------|-------------|-------------|
| H | 0.17689900  | -3.28120700 | 6.70167400  |
| H | 2.50249700  | -0.39760800 | 4.51247200  |
| H | 1.92036700  | -1.49931400 | 6.66518700  |
| C | -0.18629800 | -4.31068400 | 1.70074300  |
| C | 0.53826200  | -6.88523600 | 0.75940900  |
| C | -0.74391600 | -4.83769500 | 0.52336400  |
| C | 0.76870900  | -5.09597400 | 2.37747900  |
| C | 1.11308300  | -6.36309100 | 1.91503700  |
| C | -0.38183200 | -6.10321900 | 0.06702400  |
| H | -1.45508700 | -4.26295800 | -0.05842700 |
| H | 1.26696400  | -4.72127600 | 3.26934600  |
| H | 1.85302300  | -6.94157100 | 2.47007200  |
| H | -0.84097800 | -6.47898600 | -0.84858800 |
| H | 0.80795000  | -7.87871500 | 0.40172600  |
| C | -3.29306200 | -3.15378600 | 0.91504300  |
| C | -5.26809800 | -5.12908100 | 1.26146400  |
| C | -4.15039200 | -3.50831800 | -0.13762800 |
| C | -3.45914000 | -3.79706700 | 2.15282900  |
| C | -4.43622300 | -4.77153300 | 2.32385400  |
| C | -5.12336900 | -4.49234300 | 0.03118300  |
| H | -4.05327900 | -3.02529300 | -1.11184100 |
| H | -2.81455800 | -3.51923800 | 2.98783300  |
| H | -4.55253200 | -5.25617600 | 3.29410300  |
| H | -5.77215600 | -4.76003700 | -0.80376700 |
| H | -6.03008000 | -5.89764900 | 1.39561300  |
| C | -2.62179200 | -1.02057500 | -0.27219100 |
| H | -1.99392600 | -0.10354300 | -0.21391600 |
| H | -3.66103500 | -0.67883600 | -0.18294000 |
| H | -2.48617700 | -1.38228600 | -1.30327100 |

-----

**Zr<sup>+</sup>/N-TS**

Free energy (M06-2X-D3/def2-TZVP) = -1878.620466

|   |             |             |             |
|---|-------------|-------------|-------------|
| C | -0.15486900 | -0.80892600 | -0.35938500 |
| C | 0.13766500  | -0.87668300 | -1.67815300 |
| C | 0.46557900  | 0.41107800  | -2.40098200 |
| H | 1.50063300  | 0.41205600  | -2.77187300 |

|    |             |             |             |
|----|-------------|-------------|-------------|
| H  | 0.32824400  | 1.34371200  | -1.80996400 |
| H  | -0.19141300 | 0.54505400  | -3.27355400 |
| C  | 0.18547900  | -2.05429300 | -2.60745800 |
| C  | 0.29853000  | -4.14394800 | -4.48736600 |
| C  | 1.18546800  | -3.03207600 | -2.53011200 |
| C  | -0.73487300 | -2.12490500 | -3.66579300 |
| C  | -0.69028300 | -3.16533700 | -4.58927200 |
| C  | 1.23835600  | -4.06807500 | -3.46222700 |
| H  | 1.92783100  | -2.99565800 | -1.73197300 |
| H  | -1.50622900 | -1.35555100 | -3.76697300 |
| H  | -1.42522400 | -3.20861500 | -5.39398900 |
| H  | 2.02287200  | -4.82157700 | -3.37984400 |
| H  | 0.33974600  | -4.95855900 | -5.21138800 |
| N  | -0.54858700 | -1.99165100 | 0.42224600  |
| C  | 0.38007500  | -3.08895800 | 0.45956900  |
| C  | 2.30516400  | -5.12692900 | 0.52513100  |
| C  | 1.69408500  | -2.81655800 | 0.84787600  |
| C  | 0.02374400  | -4.39878100 | 0.13142400  |
| C  | 0.98851900  | -5.40617900 | 0.16516400  |
| C  | 2.65446000  | -3.82034000 | 0.87309500  |
| H  | 1.95365300  | -1.79240000 | 1.10893300  |
| H  | -0.99336500 | -4.63243600 | -0.18160800 |
| H  | 0.70247700  | -6.42306800 | -0.10696100 |
| H  | 3.67790000  | -3.58673800 | 1.17376700  |
| H  | 3.05142900  | -5.92133700 | 0.54650200  |
| C  | -1.93938800 | -2.38525000 | 0.34748100  |
| C  | -4.64176100 | -3.16330500 | 0.27100900  |
| C  | -2.70238100 | -2.19710700 | -0.80505000 |
| C  | -2.53163900 | -3.01948400 | 1.44959300  |
| C  | -3.87093800 | -3.39529600 | 1.41175500  |
| C  | -4.04533300 | -2.57720100 | -0.84100400 |
| H  | -2.24291300 | -1.76752800 | -1.68816100 |
| H  | -1.93814800 | -3.24601500 | 2.33408600  |
| H  | -4.31389600 | -3.88077900 | 2.28233400  |
| H  | -4.62174500 | -2.41812800 | -1.75362400 |
| H  | -5.69129000 | -3.45761500 | 0.24546500  |
| Zr | 0.17460500  | 1.32573700  | 0.51200800  |
| C  | 2.71150000  | 0.84627000  | 0.19703500  |

|   |             |             |             |
|---|-------------|-------------|-------------|
| C | 2.49190300  | 0.90224200  | 1.59928600  |
| C | 2.06209700  | 2.22613800  | 1.93867200  |
| C | 2.10864100  | 3.01167600  | 0.75466000  |
| C | 2.43691400  | 2.15475800  | -0.32920400 |
| C | -1.27558300 | 3.13343900  | -0.45502500 |
| C | -1.14202600 | 3.49571300  | 0.91892500  |
| C | -1.73640500 | 2.47252500  | 1.70004000  |
| C | -2.34618300 | 1.52996300  | 0.81353000  |
| C | -2.06540000 | 1.93506600  | -0.51395400 |
| C | -2.63755900 | 1.33177200  | -1.76176400 |
| H | -2.23729500 | 1.81620400  | -2.66143000 |
| H | -3.72909400 | 1.47217400  | -1.77160800 |
| H | -2.44153700 | 0.25435300  | -1.82396800 |
| C | -3.29159700 | 0.45934400  | 1.26179200  |
| H | -2.84140900 | -0.22822800 | 1.99166300  |
| H | -3.65977800 | -0.14171200 | 0.42343100  |
| H | -4.15618000 | 0.93009300  | 1.75529900  |
| C | -1.91155900 | 2.49585400  | 3.18944500  |
| H | -1.07010300 | 2.98919200  | 3.69443600  |
| H | -2.01171500 | 1.48204200  | 3.59892200  |
| H | -2.82603500 | 3.05010300  | 3.45493100  |
| C | -0.78095800 | 4.84292500  | 1.46684000  |
| H | -0.28624600 | 5.48230500  | 0.72975500  |
| H | -0.15428700 | 4.78718000  | 2.36579600  |
| H | -1.71598000 | 5.34551200  | 1.76145900  |
| C | -0.90401000 | 3.98293000  | -1.63840200 |
| H | -0.08561800 | 4.67546600  | -1.40328600 |
| H | -1.76440400 | 4.58969900  | -1.96065100 |
| H | -0.59420000 | 3.37915100  | -2.50408000 |
| C | 2.76029500  | 2.65944600  | -1.70807600 |
| H | 3.59320500  | 3.37740800  | -1.65117500 |
| H | 1.91555400  | 3.18493800  | -2.17863600 |
| H | 3.07072900  | 1.84998600  | -2.37886500 |
| C | 2.18827300  | 4.50486700  | 0.65970800  |
| H | 3.24483600  | 4.77312800  | 0.49722900  |
| H | 1.86477500  | 5.00557700  | 1.57698100  |
| H | 1.62442800  | 4.91406800  | -0.18813200 |
| C | 1.87243100  | 2.70851700  | 3.34803600  |

|   |             |             |             |
|---|-------------|-------------|-------------|
| H | 2.84717300  | 2.86244200  | 3.83789400  |
| H | 1.31452600  | 1.98038900  | 3.95494300  |
| H | 1.33512600  | 3.66476700  | 3.38574600  |
| C | 2.89616400  | -0.10491700 | 2.63866200  |
| H | 3.48954900  | -0.91843000 | 2.20495800  |
| H | 2.06127200  | -0.55946500 | 3.19109500  |
| H | 3.52648500  | 0.39322800  | 3.38995300  |
| C | 3.34582100  | -0.27095500 | -0.58119300 |
| H | 4.07952000  | 0.13315800  | -1.29243400 |
| H | 2.61976300  | -0.87598700 | -1.14381900 |
| H | 3.88455000  | -0.95483100 | 0.08725100  |
| C | -0.24350600 | -1.15147800 | 2.60610300  |
| O | -0.25121800 | -0.00363300 | 2.29918000  |
| O | -0.17176700 | -2.10588300 | 3.24320500  |

-----

**Zr<sup>+</sup>/N-Prod**

Free energy (M06-2X-D3/def2-TZVP) = -1878.628744

-----

|   |             |             |             |
|---|-------------|-------------|-------------|
| C | -0.06974700 | -0.74520200 | -0.40390200 |
| C | 0.21268600  | -0.93617400 | -1.70809000 |
| C | 0.40125400  | 0.30855300  | -2.54849500 |
| H | 1.36443500  | 0.29829100  | -3.07946900 |
| H | 0.33487600  | 1.25318700  | -1.97238700 |
| H | -0.38274000 | 0.35782100  | -3.32066300 |
| C | 0.37742800  | -2.17942000 | -2.53396100 |
| C | 0.77449800  | -4.41712800 | -4.18601900 |
| C | 1.60405300  | -2.85661200 | -2.53810800 |
| C | -0.62677900 | -2.60730000 | -3.41173700 |
| C | -0.43595100 | -3.72779600 | -4.21999700 |
| C | 1.79878500  | -3.96873600 | -3.35244500 |
| H | 2.40494000  | -2.52193000 | -1.87858000 |
| H | -1.56976900 | -2.06011400 | -3.48222900 |
| H | -1.23417300 | -4.05464500 | -4.88765000 |
| H | 2.75665200  | -4.49055600 | -3.33021200 |
| H | 0.92489500  | -5.29169100 | -4.82006300 |
| N | -0.42531100 | -1.89230400 | 0.53694700  |
| C | 0.37117500  | -3.14121700 | 0.35503600  |
| C | 1.95121700  | -5.40399600 | -0.01720000 |

|    |             |             |             |
|----|-------------|-------------|-------------|
| C  | 1.69225100  | -3.14550900 | 0.79414200  |
| C  | -0.17717100 | -4.27189900 | -0.24442500 |
| C  | 0.62278600  | -5.39867500 | -0.43299500 |
| C  | 2.48329600  | -4.27350600 | 0.60268800  |
| H  | 2.09530400  | -2.27939400 | 1.31370400  |
| H  | -1.20984000 | -4.28897600 | -0.58692200 |
| H  | 0.19322900  | -6.27819200 | -0.91334900 |
| H  | 3.51448200  | -4.27276600 | 0.95784100  |
| H  | 2.56810000  | -6.29150900 | -0.16160000 |
| C  | -1.88983000 | -2.23095400 | 0.49381400  |
| C  | -4.57328300 | -2.99521000 | 0.37370300  |
| C  | -2.60795400 | -2.06893800 | -0.68384100 |
| C  | -2.49512500 | -2.81642800 | 1.60862100  |
| C  | -3.83892000 | -3.17868700 | 1.54484500  |
| C  | -3.94741400 | -2.45312300 | -0.74510900 |
| H  | -2.12283000 | -1.65813800 | -1.55943900 |
| H  | -1.93219800 | -3.01207000 | 2.51886400  |
| H  | -4.30809000 | -3.62377800 | 2.42276400  |
| H  | -4.49865600 | -2.32205700 | -1.67720700 |
| H  | -5.62264000 | -3.28824100 | 0.33098800  |
| Zr | 0.13146700  | 1.38167300  | 0.59082000  |
| C  | 2.63700800  | 0.91672200  | 0.19670100  |
| C  | 2.45033400  | 0.96410300  | 1.60313300  |
| C  | 2.04466700  | 2.28801900  | 1.95592300  |
| C  | 2.06315100  | 3.07868700  | 0.77100700  |
| C  | 2.36359700  | 2.22382900  | -0.32253100 |
| C  | -1.31692300 | 3.17539200  | -0.41506100 |
| C  | -1.18152700 | 3.55670800  | 0.95407700  |
| C  | -1.78382000 | 2.54650800  | 1.74919100  |
| C  | -2.39773400 | 1.60003300  | 0.87706400  |
| C  | -2.10641900 | 1.97723700  | -0.45848000 |
| C  | -2.69084200 | 1.37537400  | -1.70281100 |
| H  | -2.27662200 | 1.84332500  | -2.60488700 |
| H  | -3.77901400 | 1.54002200  | -1.71824200 |
| H  | -2.51899000 | 0.29449700  | -1.76453500 |
| C  | -3.34350300 | 0.54958900  | 1.36540000  |
| H  | -2.88323700 | -0.08430100 | 2.13628700  |
| H  | -3.71007600 | -0.09157900 | 0.55654900  |



|   |             |             |             |
|---|-------------|-------------|-------------|
| H | -4.21266200 | 1.04262500  | 1.82871500  |
| C | -1.92498900 | 2.54197400  | 3.24257600  |
| H | -1.22881800 | 3.24422100  | 3.71919500  |
| H | -1.74019700 | 1.53967100  | 3.65579300  |
| H | -2.94590800 | 2.83682400  | 3.53240600  |
| C | -0.80969600 | 4.91066600  | 1.47962800  |
| H | -0.32386100 | 5.53707900  | 0.72570000  |
| H | -0.16782400 | 4.86644600  | 2.36827900  |
| H | -1.73814900 | 5.42090600  | 1.78063100  |
| C | -0.93974800 | 4.00640300  | -1.60986200 |
| H | -0.11469800 | 4.69406500  | -1.38391900 |
| H | -1.79434200 | 4.61720100  | -1.94023100 |
| H | -0.63416200 | 3.38899900  | -2.46740400 |
| C | 2.65271500  | 2.71590500  | -1.71308200 |
| H | 3.53670200  | 3.37275600  | -1.69814600 |
| H | 1.82368300  | 3.30245600  | -2.13622900 |
| H | 2.87113300  | 1.89015300  | -2.40057200 |
| C | 2.15302300  | 4.57168200  | 0.67990400  |
| H | 3.21027800  | 4.83142700  | 0.50812400  |
| H | 1.84228700  | 5.07326400  | 1.60115800  |
| H | 1.58470600  | 4.98756700  | -0.16149400 |
| C | 1.84673300  | 2.75714700  | 3.36875000  |
| H | 2.81779400  | 2.87571600  | 3.87522900  |
| H | 1.25933200  | 2.03494200  | 3.95481000  |
| H | 1.33575400  | 3.72768600  | 3.41023500  |
| C | 2.80456200  | -0.08712700 | 2.61401800  |
| H | 3.36661400  | -0.90861100 | 2.15178500  |
| H | 1.93780900  | -0.50613000 | 3.14531100  |
| H | 3.46210900  | 0.35413600  | 3.37759000  |
| C | 3.27339800  | -0.18881800 | -0.58956300 |
| H | 4.35964900  | -0.01774700 | -0.65212700 |
| H | 2.88935100  | -0.23708100 | -1.61618400 |
| H | 3.11284600  | -1.17104800 | -0.13176700 |
| C | -0.17118900 | -1.32441100 | 2.04947400  |
| O | -0.29849200 | -0.07191900 | 2.09030000  |
| O | 0.06763900  | -2.13453700 | 2.88150300  |

**Zr<sup>+</sup>/As-Rea**

Free energy (M06-2X-D3/def2-TZVP) = -3871.195241

---

|    |             |             |             |
|----|-------------|-------------|-------------|
| Zr | -0.01430500 | 0.27546800  | 1.01390300  |
| C  | 2.19406600  | 0.45364100  | -0.16750900 |
| C  | 1.32988200  | 1.32878200  | -0.87845800 |
| C  | 0.29508100  | 0.53795700  | -1.46598200 |
| C  | 0.58625700  | -0.83690700 | -1.20860400 |
| C  | 1.75741300  | -0.89066400 | -0.40139400 |
| C  | -0.01322900 | 2.60151000  | 1.96738000  |
| C  | -0.02564200 | 1.72154400  | 3.08797500  |
| C  | -1.28346500 | 1.05047900  | 3.10916900  |
| C  | -2.03483700 | 1.49260100  | 1.98253700  |
| C  | -1.25686600 | 2.45001100  | 1.27295300  |
| C  | 2.60412300  | -2.09068000 | -0.08791600 |
| H  | 2.90920500  | -2.12784400 | 0.96732500  |
| H  | 3.52125600  | -2.04499600 | -0.69606800 |
| H  | 2.09440100  | -3.03243200 | -0.32076900 |
| C  | -0.09934000 | -1.98234300 | -1.89041100 |
| H  | -1.17369300 | -2.01886600 | -1.66481500 |
| H  | 0.34169800  | -2.94170300 | -1.59631800 |
| H  | 0.01237500  | -1.88110100 | -2.98090800 |
| C  | -0.73629500 | 1.02869000  | -2.44103300 |
| H  | -0.34298700 | 0.95861400  | -3.46817500 |
| H  | -1.00360200 | 2.07835900  | -2.26500600 |
| H  | -1.65477100 | 0.42657100  | -2.40726100 |
| C  | 1.62245000  | 2.75445100  | -1.23549300 |
| H  | 2.07059100  | 2.76890200  | -2.24192700 |
| H  | 2.34238300  | 3.21764600  | -0.55261400 |
| H  | 0.72412900  | 3.38123600  | -1.27896500 |
| C  | 3.45995800  | 0.81299300  | 0.55761900  |
| H  | 3.50446000  | 1.88117500  | 0.80603200  |
| H  | 4.33810600  | 0.58427300  | -0.06683000 |
| H  | 3.57572500  | 0.23876200  | 1.48939800  |
| C  | -1.79398300 | 3.31451400  | 0.16890700  |
| H  | -2.43163300 | 4.10434500  | 0.59566700  |
| H  | -2.41443500 | 2.74437200  | -0.53645800 |
| H  | -0.99919600 | 3.81215400  | -0.39849500 |
| C  | -3.48358700 | 1.18099600  | 1.76883400  |

|    |             |             |             |
|----|-------------|-------------|-------------|
| H  | -3.70925000 | 0.13461200  | 2.01604900  |
| H  | -3.80288100 | 1.37201200  | 0.73664400  |
| H  | -4.09624400 | 1.81902100  | 2.42638200  |
| C  | -1.88794200 | 0.24088900  | 4.21604300  |
| H  | -2.23631700 | -0.74340900 | 3.87222600  |
| H  | -2.76508200 | 0.77726800  | 4.60928600  |
| H  | -1.19244900 | 0.07945000  | 5.04613500  |
| C  | 1.06978300  | 1.64749000  | 4.11596800  |
| H  | 1.94709300  | 1.07089700  | 3.77797200  |
| H  | 0.70734600  | 1.18889100  | 5.04454800  |
| H  | 1.42744800  | 2.65760300  | 4.36223500  |
| C  | 1.01136300  | 3.68156100  | 1.77395000  |
| H  | 2.04072100  | 3.29676000  | 1.74782200  |
| H  | 0.95207800  | 4.38682600  | 2.61784600  |
| H  | 0.83373700  | 4.25521300  | 0.85851600  |
| C  | -1.44010900 | -1.44720500 | 1.15816100  |
| C  | -2.60661900 | -1.97714900 | 0.73675000  |
| As | -0.00482300 | -2.17276300 | 2.28803800  |
| C  | -0.23642700 | -2.67488400 | 4.15190000  |
| C  | -0.32310200 | -3.47745700 | 6.82508800  |
| C  | 0.42548500  | -1.92943400 | 5.13154200  |
| C  | -0.90024700 | -3.85470800 | 4.50644500  |
| C  | -0.95156100 | -4.24533800 | 5.84310500  |
| C  | 0.37584800  | -2.32536900 | 6.46835600  |
| H  | 0.98843300  | -1.03770700 | 4.84844900  |
| H  | -1.36487600 | -4.47670500 | 3.73941200  |
| H  | -1.47484800 | -5.16253700 | 6.11736300  |
| H  | 0.89380500  | -1.73987900 | 7.22924800  |
| H  | -0.36211500 | -3.79003600 | 7.86940600  |
| C  | 0.48828100  | -3.90000400 | 1.56150800  |
| C  | 1.32260000  | -6.38202300 | 0.59140000  |
| C  | -0.17506000 | -4.48573700 | 0.48352300  |
| C  | 1.56088400  | -4.56677400 | 2.16776200  |
| C  | 1.97753900  | -5.80241600 | 1.68010300  |
| C  | 0.24471900  | -5.72680900 | -0.00040600 |
| H  | -1.01839100 | -3.97683000 | 0.01927900  |
| H  | 2.07390100  | -4.12340500 | 3.02547100  |
| H  | 2.81609800  | -6.31601200 | 2.15204900  |

|   |             |             |             |
|---|-------------|-------------|-------------|
| H | -0.28094300 | -6.18426200 | -0.83987400 |
| H | 1.64928000  | -7.35059700 | 0.21090900  |
| C | -3.26198300 | -3.19888900 | 1.28631700  |
| C | -4.56562700 | -5.46440300 | 2.31775900  |
| C | -3.71661100 | -4.21609100 | 0.43129000  |
| C | -3.49275900 | -3.32730200 | 2.66013500  |
| C | -4.14501000 | -4.44892800 | 3.17298700  |
| C | -4.34642600 | -5.34588900 | 0.94384700  |
| H | -3.55876600 | -4.13443300 | -0.64649900 |
| H | -3.17019200 | -2.53113000 | 3.33305200  |
| H | -4.32531400 | -4.52434700 | 4.24666600  |
| H | -4.67624200 | -6.13579500 | 0.26786500  |
| H | -5.07273800 | -6.34351300 | 2.71708600  |
| C | -3.38001900 | -1.30663700 | -0.37828100 |
| H | -2.88539900 | -0.38034400 | -0.70149700 |
| H | -4.40715600 | -1.07754600 | -0.05666100 |
| H | -3.46983500 | -1.97586700 | -1.24865900 |

-----

**Zr<sup>+</sup>/As-TS**

Free energy (M06-2X-D3/def2-TZVP) = -4059.564846

-----

|    |             |             |             |
|----|-------------|-------------|-------------|
| As | -0.18129400 | -0.16185600 | 0.26156800  |
| C  | -1.62057100 | -1.01414300 | -0.73693600 |
| C  | -0.49016100 | 1.71135300  | -0.17581000 |
| C  | -2.31789300 | -0.35558700 | -1.75478900 |
| C  | -2.00140800 | -2.30845600 | -0.36475400 |
| C  | 1.60337700  | -0.52882500 | -0.51138400 |
| C  | -0.03934800 | 2.29836800  | -1.36147800 |
| C  | -1.20405200 | 2.48659500  | 0.74515300  |
| C  | -3.36414000 | -1.00130700 | -2.41101400 |
| H  | -2.04294700 | 0.65898200  | -2.04859900 |
| C  | -3.03951200 | -2.95704900 | -1.03223200 |
| H  | -1.49682000 | -2.81672200 | 0.46163500  |
| C  | 1.82154900  | -0.86458400 | -1.80377700 |
| Zr | 3.21357200  | -0.58040800 | 1.14385300  |
| C  | -0.28098700 | 3.64801900  | -1.61698800 |
| H  | 0.49822700  | 1.69188500  | -2.08991200 |
| C  | -1.44219600 | 3.83820900  | 0.49233400  |

|   |             |             |             |
|---|-------------|-------------|-------------|
| H | -1.57642800 | 2.03838800  | 1.67042300  |
| C | -3.72075200 | -2.30307400 | -2.05842600 |
| H | -3.90057500 | -0.48363000 | -3.20758200 |
| H | -3.32866100 | -3.96690800 | -0.73773600 |
| C | 3.21849000  | -1.14172300 | -2.31213000 |
| C | 0.81483600  | -1.04832500 | -2.90419200 |
| C | -0.97524300 | 4.42132200  | -0.68543800 |
| H | 0.07271800  | 4.09761600  | -2.54622600 |
| H | -1.99606400 | 4.43646800  | 1.21715900  |
| H | -4.54016400 | -2.80445400 | -2.57546700 |
| H | 3.28485400  | -2.16515700 | -2.71413800 |
| H | 3.98928800  | -1.01797000 | -1.53460600 |
| H | 3.46275000  | -0.47047000 | -3.15045200 |
| C | 0.68678400  | -0.08200600 | -3.90966300 |
| C | 0.08184300  | -2.23633200 | -3.02137500 |
| H | -1.16025400 | 5.47825200  | -0.88187000 |
| C | -0.19603000 | -0.26976200 | -4.97314600 |
| H | 1.29408400  | 0.82641500  | -3.86997200 |
| C | -0.78646200 | -2.43405100 | -4.09206400 |
| H | 0.17770100  | -3.00904400 | -2.25859200 |
| C | -0.93658600 | -1.44656600 | -5.06541200 |
| H | -0.29264100 | 0.50058200  | -5.73947100 |
| H | -1.35504900 | -3.36266900 | -4.15994500 |
| H | -1.62098800 | -1.59891400 | -5.90098600 |
| C | 3.62506200  | -2.37754900 | 2.85330400  |
| C | 3.76723700  | -2.04611400 | 4.31150200  |
| C | 2.40240700  | -2.72423100 | 2.19550100  |
| C | 4.67870700  | -2.53997300 | 1.91320000  |
| H | 2.97129400  | -1.37186800 | 4.66025100  |
| H | 3.71271000  | -2.95918000 | 4.92412300  |
| H | 4.73172900  | -1.56630400 | 4.52434800  |
| C | 1.06344100  | -2.87939300 | 2.85409900  |
| C | 2.69872100  | -3.06828200 | 0.84933600  |
| C | 6.14281900  | -2.66200600 | 2.20612400  |
| C | 4.10639900  | -2.92074500 | 0.66330000  |
| H | 0.24083400  | -2.49357800 | 2.23320600  |
| H | 0.85907700  | -3.94605900 | 3.03539100  |
| H | 1.02779200  | -2.37957800 | 3.83206700  |

|   |             |             |             |
|---|-------------|-------------|-------------|
| C | 1.73524700  | -3.68556300 | -0.11323000 |
| H | 6.77039100  | -2.22505300 | 1.41874200  |
| H | 6.39110200  | -3.73480700 | 2.25237800  |
| H | 6.42374400  | -2.22141600 | 3.16775400  |
| C | 4.91766400  | -3.38677400 | -0.51243400 |
| H | 0.73403900  | -3.24086600 | -0.02931800 |
| H | 1.64668500  | -4.76437300 | 0.09143900  |
| H | 2.06597100  | -3.56339800 | -1.15212600 |
| H | 5.64100300  | -2.63340600 | -0.85691600 |
| H | 5.49232700  | -4.28200400 | -0.22783300 |
| H | 4.28151800  | -3.65913400 | -1.36191600 |
| C | 5.22222800  | 0.71694900  | 0.36592600  |
| C | 6.31368600  | 0.20634600  | -0.53280100 |
| C | 4.09128500  | 1.49818600  | -0.04129400 |
| C | 5.28600100  | 0.75748500  | 1.79581600  |
| H | 6.83312100  | -0.65710000 | -0.09546300 |
| H | 7.06811300  | 0.99197400  | -0.69469900 |
| H | 5.93760800  | -0.09078500 | -1.52105100 |
| C | 3.77053400  | 1.94152400  | -1.43716200 |
| C | 3.42957300  | 1.94932800  | 1.13202300  |
| C | 6.46530300  | 0.42203100  | 2.65786700  |
| C | 4.16243000  | 1.47960300  | 2.26394700  |
| H | 2.73189700  | 1.71275100  | -1.71183200 |
| H | 3.90942100  | 3.03057700  | -1.51423100 |
| H | 4.43812800  | 1.47214500  | -2.16960200 |
| C | 2.29133400  | 2.92141100  | 1.20065400  |
| H | 6.17850400  | -0.06747400 | 3.59824300  |
| H | 6.96914600  | 1.36347500  | 2.92937600  |
| H | 7.20119300  | -0.20430900 | 2.14452400  |
| C | 3.89635700  | 1.83834400  | 3.69621500  |
| H | 1.47162300  | 2.57499800  | 1.84712100  |
| H | 2.64949100  | 3.87434200  | 1.62010200  |
| H | 1.86621000  | 3.12138600  | 0.21054300  |
| H | 4.05460800  | 0.98750900  | 4.37474000  |
| H | 4.57884200  | 2.64126200  | 4.01672200  |
| H | 2.87044900  | 2.20215400  | 3.83566500  |
| C | 0.49796900  | 0.11592800  | 2.95981000  |
| O | -0.49228100 | 0.24449700  | 3.52648500  |

O 1.65707900 0.05642300 2.70050400

---

**Zr<sup>+</sup>/As-Pro**

Free energy (M06-2X-D3/def2-TZVP) = -4059.591832

---

|    |             |             |             |
|----|-------------|-------------|-------------|
| C  | 0.04427500  | -0.42159000 | -0.64677300 |
| C  | 0.17234900  | -0.56932900 | -1.98538300 |
| C  | 0.31139900  | 0.63700900  | -2.88088800 |
| H  | 1.27026100  | 0.59980500  | -3.42186100 |
| H  | 0.24983200  | 1.58357100  | -2.32357300 |
| H  | -0.47420500 | 0.63409700  | -3.65233800 |
| C  | 0.25123400  | -1.85677600 | -2.74569800 |
| C  | 0.46950500  | -4.20234900 | -4.27230100 |
| C  | 1.35911900  | -2.69966600 | -2.60210200 |
| C  | -0.73487000 | -2.19154300 | -3.68750500 |
| C  | -0.63756000 | -3.36523500 | -4.42962300 |
| C  | 1.47040100  | -3.86198200 | -3.36604700 |
| H  | 2.14239900  | -2.44364900 | -1.88693200 |
| H  | -1.58882700 | -1.52578000 | -3.83995800 |
| H  | -1.41995900 | -3.62118300 | -5.14514300 |
| H  | 2.34326600  | -4.50489200 | -3.24400500 |
| H  | 0.55398000  | -5.11288800 | -4.86678600 |
| As | -0.30311300 | -1.94080800 | 0.48566200  |
| C  | 0.72382000  | -3.56634000 | 0.54419600  |
| C  | 2.12163400  | -5.96648100 | 0.66453000  |
| C  | 1.74191900  | -3.72739700 | 1.48893900  |
| C  | 0.37889600  | -4.61300000 | -0.31860300 |
| C  | 1.08479700  | -5.81095700 | -0.25776300 |
| C  | 2.44516300  | -4.93099000 | 1.53970700  |
| H  | 1.96035400  | -2.94331400 | 2.21479900  |
| H  | -0.43271900 | -4.49435200 | -1.04129000 |
| H  | 0.82042600  | -6.62804300 | -0.93019500 |
| H  | 3.23633700  | -5.06271100 | 2.27839200  |
| H  | 2.67002300  | -6.90826800 | 0.71150700  |
| C  | -2.11868900 | -2.55225100 | 0.34625300  |
| C  | -4.74266300 | -3.45651100 | 0.24319800  |
| C  | -2.85494900 | -2.39727900 | -0.82894000 |

|    |             |             |             |
|----|-------------|-------------|-------------|
| C  | -2.67925500 | -3.16925300 | 1.47054400  |
| C  | -3.99805100 | -3.61502100 | 1.41365300  |
| C  | -4.17174100 | -2.85512700 | -0.87802500 |
| H  | -2.40499400 | -1.92252400 | -1.70114200 |
| H  | -2.09584800 | -3.28815900 | 2.38759500  |
| H  | -4.44595500 | -4.08836700 | 2.28810300  |
| H  | -4.75226600 | -2.74007700 | -1.79413800 |
| H  | -5.77451100 | -3.80807800 | 0.20481400  |
| Zr | 0.21384800  | 1.54738800  | 0.65310400  |
| C  | 2.66858300  | 1.04503000  | 0.10900600  |
| C  | 2.53708300  | 1.08055300  | 1.52257000  |
| C  | 2.19754900  | 2.41153300  | 1.90986000  |
| C  | 2.16387300  | 3.20981800  | 0.73004600  |
| C  | 2.40586100  | 2.36017400  | -0.38687700 |
| C  | -1.29946300 | 3.28985500  | -0.38088100 |
| C  | -1.16823900 | 3.65069900  | 0.99810200  |
| C  | -1.76390200 | 2.62316500  | 1.77818000  |
| C  | -2.31413800 | 1.65571200  | 0.89152900  |
| C  | -2.04034400 | 2.06795800  | -0.44149900 |
| C  | -2.62752200 | 1.44751400  | -1.67450500 |
| H  | -2.23924100 | 1.91678800  | -2.58656600 |
| H  | -3.71883300 | 1.59148900  | -1.67068300 |
| H  | -2.43312000 | 0.36760800  | -1.72755500 |
| C  | -3.16944300 | 0.50504200  | 1.32237700  |
| H  | -2.67831600 | -0.11129000 | 2.09086900  |
| H  | -3.44141600 | -0.14159600 | 0.47925400  |
| H  | -4.10155900 | 0.88424300  | 1.76963200  |
| C  | -1.90312600 | 2.59990600  | 3.27130600  |
| H  | -1.18813400 | 3.27757700  | 3.75678800  |
| H  | -1.74114800 | 1.58825900  | 3.66900000  |
| H  | -2.91504200 | 2.92044100  | 3.56506500  |
| C  | -0.78412900 | 4.99497700  | 1.54199800  |
| H  | -0.29612900 | 5.62468000  | 0.79139200  |
| H  | -0.12980900 | 4.92805700  | 2.42125700  |
| H  | -1.70026400 | 5.51538700  | 1.86206000  |
| C  | -0.95758000 | 4.16622000  | -1.55330700 |
| H  | -0.09748500 | 4.81517000  | -1.34267100 |
| H  | -1.80670000 | 4.82162300  | -1.80255000 |



|   |             |             |             |
|---|-------------|-------------|-------------|
| H | -0.72368500 | 3.58328500  | -2.45538500 |
| C | 2.64304700  | 2.86347900  | -1.78299300 |
| H | 3.54513000  | 3.49517000  | -1.80114000 |
| H | 1.81180200  | 3.47797100  | -2.15945700 |
| H | 2.80455900  | 2.04075900  | -2.48927900 |
| C | 2.22444800  | 4.70495600  | 0.65014800  |
| H | 3.27210700  | 4.99441600  | 0.46802000  |
| H | 1.90921300  | 5.19183300  | 1.57842000  |
| H | 1.63387900  | 5.11205000  | -0.18056100 |
| C | 2.02594100  | 2.86962700  | 3.33017700  |
| H | 2.99844800  | 2.90856100  | 3.84467900  |
| H | 1.38247500  | 2.18247700  | 3.90031300  |
| H | 1.58586000  | 3.87400400  | 3.38295300  |
| C | 2.82160400  | -0.04319600 | 2.46941100  |
| H | 2.70081000  | -1.01819600 | 1.97778700  |
| H | 2.16322000  | -0.01852200 | 3.34813700  |
| H | 3.86306900  | 0.01304100  | 2.82245100  |
| C | 3.20266800  | -0.10810300 | -0.68433500 |
| H | 4.30273600  | -0.06443400 | -0.70957600 |
| H | 2.84169500  | -0.09861500 | -1.72095100 |
| H | 2.91943800  | -1.07309300 | -0.23896400 |
| C | -0.16605600 | -1.10423800 | 2.31198600  |
| O | -0.11195500 | 0.17614600  | 2.21879100  |
| O | -0.17057000 | -1.80035800 | 3.28619200  |

-----

### Zr<sup>+</sup>/Sb-Rea

Free energy (M06-2X-D3/def2-TZVP) = -1875.732149

-----

|    |             |             |             |
|----|-------------|-------------|-------------|
| Zr | -0.00238500 | 0.38696400  | 0.95748800  |
| C  | 2.18403100  | 0.54462200  | -0.27921300 |
| C  | 1.30019700  | 1.40406600  | -0.98370600 |
| C  | 0.25125400  | 0.60123700  | -1.53332600 |
| C  | 0.54580900  | -0.76621900 | -1.24800400 |
| C  | 1.73706300  | -0.80268000 | -0.46988200 |
| C  | -0.00514500 | 2.72960300  | 1.87749400  |
| C  | 0.01579500  | 1.85327400  | 2.99841200  |
| C  | -1.23610300 | 1.16988400  | 3.04804500  |

|   |             |             |             |
|---|-------------|-------------|-------------|
| C | -2.01693100 | 1.60012700  | 1.93979400  |
| C | -1.25884300 | 2.55767300  | 1.20584400  |
| C | 2.57980000  | -2.00970100 | -0.17144400 |
| H | 3.03017800  | -1.97287000 | 0.83060200  |
| H | 3.40463800  | -2.05386800 | -0.90041200 |
| H | 2.01379300  | -2.94490700 | -0.25615800 |
| C | -0.15681000 | -1.94275500 | -1.85046800 |
| H | -1.24139500 | -1.78480800 | -1.89912600 |
| H | 0.02896500  | -2.85925400 | -1.27767100 |
| H | 0.20653100  | -2.10631800 | -2.87736500 |
| C | -0.80234300 | 1.08260000  | -2.48930500 |
| H | -0.43618800 | 0.99507400  | -3.52478700 |
| H | -1.05771400 | 2.13654300  | -2.32143200 |
| H | -1.72412800 | 0.48862700  | -2.42304500 |
| C | 1.57452000  | 2.82789900  | -1.36235200 |
| H | 1.99657200  | 2.83760700  | -2.38000700 |
| H | 2.30817000  | 3.30183300  | -0.70154000 |
| H | 0.67090300  | 3.44815800  | -1.38697800 |
| C | 3.46596300  | 0.92140500  | 0.40743400  |
| H | 3.50496400  | 1.99148600  | 0.64936000  |
| H | 4.32853900  | 0.70041800  | -0.24097200 |
| H | 3.61216100  | 0.35334600  | 1.33846500  |
| C | -1.82298200 | 3.40548100  | 0.10236500  |
| H | -2.46684800 | 4.18898200  | 0.53142800  |
| H | -2.44366900 | 2.82069500  | -0.59058700 |
| H | -1.04271700 | 3.91057300  | -0.47862300 |
| C | -3.46438500 | 1.26910500  | 1.74765600  |
| H | -3.67253000 | 0.21974900  | 1.99727900  |
| H | -3.79970200 | 1.45460400  | 0.71958300  |
| H | -4.07616800 | 1.89945100  | 2.41304500  |
| C | -1.78103100 | 0.33678500  | 4.16705500  |
| H | -2.28667100 | -0.56783500 | 3.80002900  |
| H | -2.52969700 | 0.92208900  | 4.72336700  |
| H | -1.00639200 | 0.03497100  | 4.87956500  |
| C | 1.12577800  | 1.79533100  | 4.00880800  |
| H | 2.11792100  | 1.77819000  | 3.53375400  |
| H | 1.04508200  | 0.90930400  | 4.65084700  |
| H | 1.09471000  | 2.68300000  | 4.66004700  |

|    |             |             |             |
|----|-------------|-------------|-------------|
| C  | 1.01189900  | 3.80997100  | 1.65113000  |
| H  | 2.04008800  | 3.42445300  | 1.59703100  |
| H  | 0.97839700  | 4.51662700  | 2.49484300  |
| H  | 0.80907200  | 4.37986300  | 0.73836900  |
| C  | -1.39155800 | -1.33066300 | 1.11967500  |
| C  | -2.54890200 | -1.89328100 | 0.72028000  |
| Sb | 0.21096500  | -2.13416900 | 2.46171400  |
| C  | -0.25714200 | -2.83806600 | 4.43525800  |
| C  | -0.61438500 | -3.89263500 | 7.00190100  |
| C  | 0.20679200  | -2.14160800 | 5.55680900  |
| C  | -0.85806900 | -4.09112600 | 4.60345800  |
| C  | -1.04448800 | -4.60910300 | 5.88473000  |
| C  | 0.02119400  | -2.66295900 | 6.83742000  |
| H  | 0.73535100  | -1.19218600 | 5.44264700  |
| H  | -1.17670100 | -4.67354800 | 3.73637900  |
| H  | -1.51901000 | -5.58392600 | 6.00831300  |
| H  | 0.38453600  | -2.11181900 | 7.70577900  |
| H  | -0.75912300 | -4.30227100 | 8.00245200  |
| C  | 0.63617000  | -4.06446800 | 1.65069600  |
| C  | 1.26585200  | -6.62338400 | 0.71709400  |
| C  | -0.14450200 | -4.65964800 | 0.65707800  |
| C  | 1.72827400  | -4.76020900 | 2.18526400  |
| C  | 2.04242500  | -6.03453000 | 1.71633400  |
| C  | 0.17181900  | -5.93832100 | 0.19231500  |
| H  | -1.00864200 | -4.13652500 | 0.24777300  |
| H  | 2.34107100  | -4.31742000 | 2.97571200  |
| H  | 2.89572100  | -6.57036800 | 2.13440100  |
| H  | -0.44705400 | -6.40043700 | -0.57830800 |
| H  | 1.51202700  | -7.62150400 | 0.35251200  |
| C  | -3.17861000 | -3.12683100 | 1.27703000  |
| C  | -4.40835700 | -5.43314200 | 2.31483400  |
| C  | -3.68312800 | -4.11990300 | 0.42049300  |
| C  | -3.32414200 | -3.30121600 | 2.65731000  |
| C  | -3.93941500 | -4.44233200 | 3.17340600  |
| C  | -4.27545600 | -5.26904200 | 0.93448600  |
| H  | -3.59045700 | -4.00583700 | -0.66145700 |
| H  | -2.96574700 | -2.52677200 | 3.33762000  |
| H  | -4.05072700 | -4.55149900 | 4.25356600  |

|   |             |             |             |
|---|-------------|-------------|-------------|
| H | -4.64373800 | -6.03865600 | 0.25485400  |
| H | -4.88637200 | -6.32731900 | 2.71657200  |
| C | -3.35461900 | -1.23786800 | -0.38535800 |
| H | -2.88744400 | -0.29807000 | -0.70894200 |
| H | -4.38213800 | -1.03423400 | -0.04776500 |
| H | -3.43952000 | -1.90311200 | -1.25875400 |

-----

**Zr<sup>+</sup>/Sb-TS**

Free energy (M06-2X-D3/def2-TZVP) = -2064.099866

-----

|    |             |             |             |
|----|-------------|-------------|-------------|
| Sb | -0.29533800 | -0.12397800 | 0.36099500  |
| C  | -1.84231500 | -1.06889200 | -0.77838900 |
| C  | -0.60714400 | 1.90872200  | -0.24952400 |
| C  | -2.53212100 | -0.37774800 | -1.77915300 |
| C  | -2.20161300 | -2.38647700 | -0.47046100 |
| C  | 1.69637400  | -0.57878600 | -0.46550800 |
| C  | -0.17154900 | 2.40802500  | -1.48140500 |
| C  | -1.24147400 | 2.77068000  | 0.65300900  |
| C  | -3.55823500 | -1.01169500 | -2.47982800 |
| H  | -2.27014100 | 0.65386200  | -2.02515300 |
| C  | -3.22038500 | -3.02052900 | -1.18021000 |
| H  | -1.69460300 | -2.93094200 | 0.33225400  |
| C  | 1.88324800  | -0.88739000 | -1.76938700 |
| Zr | 3.25965300  | -0.62087400 | 1.20221200  |
| C  | -0.35470700 | 3.75380100  | -1.80153100 |
| H  | 0.30923300  | 1.74214200  | -2.19888600 |
| C  | -1.42468300 | 4.11691300  | 0.33327900  |
| H  | -1.59089800 | 2.40122300  | 1.62170700  |
| C  | -3.89850600 | -2.33198600 | -2.18678700 |
| H  | -4.09199100 | -0.46983100 | -3.26215300 |
| H  | -3.49551400 | -4.04809200 | -0.93753300 |
| C  | 3.26426800  | -1.17084900 | -2.32033900 |
| C  | 0.84954000  | -1.04445700 | -2.84837700 |
| C  | -0.97565200 | 4.61019500  | -0.89141300 |
| H  | -0.01307200 | 4.13474100  | -2.76537200 |
| H  | -1.91865900 | 4.78181200  | 1.04333500  |
| H  | -4.70199400 | -2.82382500 | -2.73705100 |

|   |             |             |             |
|---|-------------|-------------|-------------|
| H | 3.48749900  | -0.49703700 | -3.16238300 |
| H | 3.30791200  | -2.19167800 | -2.73283600 |
| H | 4.05396600  | -1.05902100 | -1.56243900 |
| C | 0.07401000  | -2.20721100 | -2.93659800 |
| C | 0.73722500  | -0.08675300 | -3.86471200 |
| H | -1.11556800 | 5.66308900  | -1.14001600 |
| C | -0.81671300 | -2.39116100 | -3.99180000 |
| H | 0.16105600  | -2.97417000 | -2.16661300 |
| C | -0.16997100 | -0.25782200 | -4.90987100 |
| H | 1.37565800  | 0.80092000  | -3.84438200 |
| C | -0.94943300 | -1.41177700 | -4.97510900 |
| H | -1.41652900 | -3.30129000 | -4.03847700 |
| H | -0.25511500 | 0.50575100  | -5.68431100 |
| H | -1.65171700 | -1.55206000 | -5.79788300 |
| C | 3.71472900  | -2.43954100 | 2.87569500  |
| C | 3.86439300  | -2.12229800 | 4.33630600  |
| C | 2.49294200  | -2.79581000 | 2.22241500  |
| C | 4.76279200  | -2.56753400 | 1.92413500  |
| H | 3.04930900  | -1.48194500 | 4.70390700  |
| H | 3.85121100  | -3.04442700 | 4.93759400  |
| H | 4.81368400  | -1.61047100 | 4.54345900  |
| C | 1.16133400  | -2.97969400 | 2.88853600  |
| C | 2.78423800  | -3.11624400 | 0.86864800  |
| C | 6.23166900  | -2.65710000 | 2.20527100  |
| C | 4.18698900  | -2.94348600 | 0.67376300  |
| H | 0.32587700  | -2.60726600 | 2.27599700  |
| H | 0.97607500  | -4.05065800 | 3.06464700  |
| H | 1.12052400  | -2.48451300 | 3.86850700  |
| C | 1.82065800  | -3.73330000 | -0.09457200 |
| H | 6.84258400  | -2.20232700 | 1.41477600  |
| H | 6.50685000  | -3.72349800 | 2.24675200  |
| H | 6.50892400  | -2.21178300 | 3.16601100  |
| C | 4.99619800  | -3.38384300 | -0.51307700 |
| H | 0.80737000  | -3.32354400 | 0.02522000  |
| H | 1.76766100  | -4.82004100 | 0.07747300  |
| H | 2.12304300  | -3.56765200 | -1.13608200 |
| H | 5.71180200  | -2.61918600 | -0.84838800 |
| H | 5.57943200  | -4.27882500 | -0.24541500 |

|   |             |             |             |
|---|-------------|-------------|-------------|
| H | 4.35824600  | -3.64709900 | -1.36404300 |
| C | 5.23263800  | 0.72208700  | 0.39773000  |
| C | 6.33108600  | 0.23512600  | -0.50529300 |
| C | 5.30217600  | 0.76388100  | 1.82810800  |
| C | 4.08146500  | 1.47274400  | -0.00424100 |
| H | 6.86148000  | -0.62628100 | -0.07716000 |
| H | 7.07562200  | 1.03191800  | -0.65821500 |
| H | 5.95872700  | -0.05566700 | -1.49673300 |
| C | 6.49092100  | 0.44592600  | 2.68414900  |
| C | 4.16678100  | 1.46461200  | 2.30154600  |
| C | 3.74480900  | 1.91816700  | -1.39522600 |
| C | 3.41423500  | 1.90832600  | 1.17318500  |
| H | 6.21621300  | -0.05138200 | 3.62425600  |
| H | 6.98270700  | 1.39342600  | 2.95657600  |
| H | 7.23318700  | -0.16831100 | 2.16514000  |
| C | 3.89822500  | 1.81285600  | 3.73602900  |
| H | 2.69075700  | 1.73070400  | -1.64240200 |
| H | 3.92643800  | 3.00036800  | -1.48295600 |
| H | 4.37391300  | 1.41820800  | -2.14108300 |
| C | 2.23869000  | 2.83573300  | 1.23568900  |
| H | 4.05637200  | 0.95710000  | 4.40869700  |
| H | 4.57890800  | 2.61432300  | 4.06355900  |
| H | 2.87137300  | 2.17383900  | 3.87683700  |
| H | 1.43129800  | 2.46127200  | 1.88378400  |
| H | 2.55270600  | 3.80605400  | 1.65048000  |
| H | 1.80851300  | 3.01378300  | 0.24289900  |
| C | 0.56664200  | 0.04303400  | 3.08756000  |
| O | -0.35263200 | 0.17720500  | 3.76742400  |
| O | 1.71484100  | -0.04073900 | 2.76722600  |

-----

**Zr<sup>+</sup>/Sb-Pro**

Free energy (M06-2X-D3/def2-TZVP) = -2064.118059

-----

|   |            |             |             |
|---|------------|-------------|-------------|
| C | 0.12281300 | -0.25948800 | -0.69644200 |
| C | 0.16402000 | -0.40662900 | -2.04071800 |
| C | 0.44595000 | 0.77174700  | -2.94435600 |
| H | 1.40256500 | 0.61649200  | -3.46919900 |

|    |             |             |             |
|----|-------------|-------------|-------------|
| H  | 0.49538200  | 1.72070000  | -2.38970600 |
| H  | -0.31901700 | 0.86237400  | -3.72851400 |
| C  | -0.03721500 | -1.69000700 | -2.78083400 |
| C  | -0.45955800 | -4.11747700 | -4.12896000 |
| C  | 0.79094400  | -2.79439500 | -2.54215100 |
| C  | -1.06072300 | -1.80738800 | -3.73377300 |
| C  | -1.27292600 | -3.01368500 | -4.39722900 |
| C  | 0.57682400  | -4.00441200 | -3.20355000 |
| H  | 1.62773300  | -2.69902800 | -1.84844100 |
| H  | -1.71081000 | -0.95501700 | -3.94333900 |
| H  | -2.08006700 | -3.09451800 | -5.12657200 |
| H  | 1.23172200  | -4.85328500 | -3.00114200 |
| H  | -0.62680600 | -5.06008000 | -4.65149900 |
| Sb | -0.35289200 | -1.96888000 | 0.51728400  |
| C  | 0.93039600  | -3.66056100 | 0.72498300  |
| C  | 2.46519100  | -5.96959500 | 1.06414700  |
| C  | 2.32237800  | -3.60464800 | 0.59096300  |
| C  | 0.30851000  | -4.87629900 | 1.03117000  |
| C  | 1.08017400  | -6.02671600 | 1.20178300  |
| C  | 3.08597800  | -4.75792900 | 0.75812000  |
| H  | 2.82979700  | -2.66971800 | 0.34872100  |
| H  | -0.77672800 | -4.94183200 | 1.13478500  |
| H  | 0.59069800  | -6.97131500 | 1.44185800  |
| H  | 4.17008300  | -4.70835000 | 0.64973700  |
| H  | 3.06478100  | -6.87111000 | 1.19577800  |
| C  | -2.22691300 | -2.91236300 | 0.23218900  |
| C  | -4.66938900 | -4.21561500 | -0.04820000 |
| C  | -2.53313900 | -3.55748300 | -0.97117600 |
| C  | -3.12767000 | -2.93520900 | 1.30458100  |
| C  | -4.35102100 | -3.58931700 | 1.15686600  |
| C  | -3.76143700 | -4.20376300 | -1.10728900 |
| H  | -1.82268900 | -3.57275900 | -1.79957400 |
| H  | -2.87673300 | -2.46068500 | 2.25715000  |
| H  | -5.05428500 | -3.61245900 | 1.99024200  |
| H  | -4.00487600 | -4.70426600 | -2.04556100 |
| H  | -5.62805200 | -4.72409700 | -0.15950700 |
| Zr | 0.30640100  | 1.65389100  | 0.64732400  |
| C  | 2.74796500  | 1.18038300  | 0.04233200  |

|   |             |             |             |
|---|-------------|-------------|-------------|
| C | 2.60787300  | 1.05860700  | 1.45172500  |
| C | 2.29903200  | 2.34687100  | 1.98355900  |
| C | 2.26875600  | 3.26816800  | 0.89759800  |
| C | 2.50477800  | 2.54198900  | -0.30735700 |
| C | -1.13420000 | 3.49601600  | -0.36372900 |
| C | -1.11524400 | 3.71152000  | 1.05314700  |
| C | -1.78215200 | 2.61911100  | 1.67374300  |
| C | -2.22765900 | 1.73842000  | 0.65114800  |
| C | -1.85205900 | 2.28942300  | -0.60642500 |
| C | -2.36747100 | 1.80155900  | -1.92625500 |
| H | -1.90121300 | 2.32681400  | -2.76809500 |
| H | -3.45083900 | 1.99184400  | -1.97897300 |
| H | -2.21692100 | 0.72016000  | -2.05518900 |
| C | -3.07683000 | 0.52003300  | 0.83806300  |
| H | -2.86163900 | 0.00667500  | 1.78645300  |
| H | -2.95442900 | -0.19340100 | 0.00989200  |
| H | -4.14331400 | 0.79563300  | 0.86541900  |
| C | -2.03649800 | 2.47300600  | 3.14475500  |
| H | -1.23294800 | 2.92734000  | 3.74111400  |
| H | -2.11216600 | 1.41853500  | 3.44097800  |
| H | -2.97691600 | 2.97610300  | 3.41929600  |
| C | -0.75691800 | 4.98096700  | 1.76952600  |
| H | -0.21900000 | 5.68377600  | 1.12496300  |
| H | -0.15485800 | 4.80544200  | 2.67185600  |
| H | -1.68440600 | 5.47706100  | 2.09529900  |
| C | -0.71741600 | 4.48207500  | -1.41761400 |
| H | 0.09488900  | 5.13531200  | -1.07384600 |
| H | -1.56451100 | 5.13185800  | -1.68763100 |
| H | -0.38304000 | 3.98496800  | -2.33961000 |
| C | 2.74452700  | 3.17705600  | -1.64785500 |
| H | 3.69377300  | 3.73561700  | -1.63273800 |
| H | 1.95488000  | 3.89018900  | -1.92282800 |
| H | 2.81753600  | 2.42741600  | -2.44533700 |
| C | 2.32583800  | 4.76289200  | 0.98867700  |
| H | 3.37844400  | 5.07472700  | 0.89306800  |
| H | 1.95980300  | 5.14234800  | 1.94838400  |
| H | 1.77232200  | 5.25771700  | 0.18057400  |
| C | 2.10822800  | 2.65973600  | 3.44049100  |



|   |             |             |             |
|---|-------------|-------------|-------------|
| H | 3.07369500  | 2.65730400  | 3.96896300  |
| H | 1.45991700  | 1.91691500  | 3.92828000  |
| H | 1.65824900  | 3.65107900  | 3.58390400  |
| C | 2.82973900  | -0.18582400 | 2.25619200  |
| H | 2.38880200  | -1.07450200 | 1.77869700  |
| H | 2.38676100  | -0.10019700 | 3.25627200  |
| H | 3.90606000  | -0.38524200 | 2.37416600  |
| C | 3.27174200  | 0.11650400  | -0.87174900 |
| H | 4.37280900  | 0.13739200  | -0.87612100 |
| H | 2.92862500  | 0.24933100  | -1.90465000 |
| H | 2.95595100  | -0.88258200 | -0.54776700 |
| C | -0.49533400 | -0.85740400 | 2.43207600  |
| O | -0.05332300 | 0.33558500  | 2.24236100  |
| O | -0.95627400 | -1.35183900 | 3.41885100  |

-----

**Zr<sup>+</sup>/Bi-Rea**

Free energy (M06-2X-D3/def2-TZVP) = -1850.038212

-----

|    |             |             |             |
|----|-------------|-------------|-------------|
| Zr | -0.03463300 | 0.42497500  | 0.90897900  |
| C  | 2.11934800  | 0.55186000  | -0.38874000 |
| C  | 1.22805200  | 1.43969700  | -1.04821800 |
| C  | 0.14892300  | 0.66291400  | -1.58006500 |
| C  | 0.42425300  | -0.71291400 | -1.32013000 |
| C  | 1.63594600  | -0.78256100 | -0.57917000 |
| C  | 0.08753000  | 2.71459200  | 1.95192200  |
| C  | -0.06643300 | 1.78404900  | 3.01914600  |
| C  | -1.36858500 | 1.20649500  | 2.92285800  |
| C  | -2.00504600 | 1.75721200  | 1.77605000  |
| C  | -1.11481500 | 2.69706500  | 1.17822400  |
| C  | 2.45562800  | -2.01304500 | -0.31723100 |
| H  | 2.94195300  | -2.00001200 | 0.66958600  |
| H  | 3.25859300  | -2.07146200 | -1.06938100 |
| H  | 1.86361000  | -2.93279200 | -0.39432600 |
| C  | -0.32083400 | -1.86667100 | -1.91461200 |
| H  | -1.38512700 | -1.63299200 | -2.04034800 |
| H  | -0.23923900 | -2.76602200 | -1.29167100 |
| H  | 0.09314600  | -2.10351800 | -2.90781600 |

|    |             |             |             |
|----|-------------|-------------|-------------|
| C  | -0.95199100 | 1.16402900  | -2.47533400 |
| H  | -0.93450200 | 0.62243300  | -3.43260000 |
| H  | -0.82439700 | 2.23035200  | -2.70030100 |
| H  | -1.95772200 | 1.02688300  | -2.04805500 |
| C  | 1.50130600  | 2.87808100  | -1.37074500 |
| H  | 1.89596000  | 2.93894100  | -2.39739900 |
| H  | 2.25708700  | 3.31215100  | -0.70676200 |
| H  | 0.60184600  | 3.50217200  | -1.33142200 |
| C  | 3.43981700  | 0.88501100  | 0.24655300  |
| H  | 3.56802100  | 1.96552200  | 0.38612100  |
| H  | 4.26692500  | 0.53709900  | -0.39192800 |
| H  | 3.56562700  | 0.39584000  | 1.22488100  |
| C  | -1.53247400 | 3.66562200  | 0.10680500  |
| H  | -2.46230900 | 4.16596200  | 0.41505700  |
| H  | -1.73065800 | 3.18456200  | -0.86112300 |
| H  | -0.77962300 | 4.44786900  | -0.04547100 |
| C  | -3.43713300 | 1.55049400  | 1.38812400  |
| H  | -3.77473500 | 0.53391800  | 1.62803300  |
| H  | -3.60006500 | 1.72367300  | 0.31555400  |
| H  | -4.08068000 | 2.25697400  | 1.93685000  |
| C  | -2.05918500 | 0.34071200  | 3.93127900  |
| H  | -2.77695900 | -0.33267100 | 3.44442800  |
| H  | -2.61980100 | 0.97176900  | 4.63851900  |
| H  | -1.36391300 | -0.26749300 | 4.52355500  |
| C  | 0.93304300  | 1.60297200  | 4.12567300  |
| H  | 1.95908900  | 1.47753200  | 3.74858300  |
| H  | 0.69185100  | 0.73307000  | 4.74818000  |
| H  | 0.93458600  | 2.48758900  | 4.78170900  |
| C  | 1.23915300  | 3.67217800  | 1.84495600  |
| H  | 2.21030800  | 3.16179200  | 1.76243000  |
| H  | 1.28174400  | 4.29867300  | 2.74907900  |
| H  | 1.13284100  | 4.34140000  | 0.98418400  |
| C  | -1.40992300 | -1.25647300 | 1.06998000  |
| C  | -2.53955300 | -1.91259700 | 0.75679800  |
| Bi | 0.39354600  | -2.06143600 | 2.53826100  |
| C  | -0.21893600 | -2.86751100 | 4.53749300  |
| C  | -0.69766400 | -3.98785400 | 7.05277400  |
| C  | 0.01702200  | -2.12205700 | 5.69620100  |

|   |             |             |             |
|---|-------------|-------------|-------------|
| C | -0.66221500 | -4.18883300 | 4.64066700  |
| C | -0.90659800 | -4.74222700 | 5.89823100  |
| C | -0.23006800 | -2.67872900 | 6.95211000  |
| H | 0.40938000  | -1.10427200 | 5.64249300  |
| H | -0.82363600 | -4.79475200 | 3.74647900  |
| H | -1.25751400 | -5.77290000 | 5.97302000  |
| H | -0.04647100 | -2.08930100 | 7.85143000  |
| H | -0.88801600 | -4.42543000 | 8.03361200  |
| C | 0.73935100  | -4.08783100 | 1.68419600  |
| C | 1.28957500  | -6.65488700 | 0.73645600  |
| C | -0.06963100 | -4.65382400 | 0.69901700  |
| C | 1.82011600  | -4.80759600 | 2.20318100  |
| C | 2.09519900  | -6.08914500 | 1.72535700  |
| C | 0.20698300  | -5.93964900 | 0.22760300  |
| H | -0.92500500 | -4.10752100 | 0.30231100  |
| H | 2.45462000  | -4.38571900 | 2.98820700  |
| H | 2.94021400  | -6.64788700 | 2.13026200  |
| H | -0.43353100 | -6.38285200 | -0.53661700 |
| H | 1.50422200  | -7.65827700 | 0.36654900  |
| C | -3.06806800 | -3.16183200 | 1.38276100  |
| C | -4.12739000 | -5.49557700 | 2.54119000  |
| C | -3.55675100 | -4.20635200 | 0.57923500  |
| C | -3.13938500 | -3.30186300 | 2.77227800  |
| C | -3.67196700 | -4.45643600 | 3.34779700  |
| C | -4.06396800 | -5.36797000 | 1.15198600  |
| H | -3.51946500 | -4.12166800 | -0.50855700 |
| H | -2.78932900 | -2.49211100 | 3.41421300  |
| H | -3.72717200 | -4.53763100 | 4.43455800  |
| H | -4.42157600 | -6.17562800 | 0.51187400  |
| H | -4.54126600 | -6.39935300 | 2.98996600  |
| C | -3.42983600 | -1.35314900 | -0.34017200 |
| H | -3.03033000 | -0.40997900 | -0.73259900 |
| H | -4.45019700 | -1.18619500 | 0.03735300  |
| H | -3.51531800 | -2.06623000 | -1.17410900 |

-----

**Zr<sup>+</sup>/Bi-TS**

Free energy (M06-2X-D3/def2-TZVP) = -2038.407152

---

|    |             |             |             |
|----|-------------|-------------|-------------|
| Bi | -0.23259500 | -0.07937300 | 0.32213900  |
| C  | -1.91089900 | -1.10302600 | -0.72650400 |
| C  | -0.64091800 | 2.01193700  | -0.33483600 |
| C  | -2.66467300 | -0.40013200 | -1.66628500 |
| C  | -2.20666100 | -2.43495600 | -0.42699900 |
| C  | 1.85328400  | -0.61580100 | -0.52309700 |
| C  | -0.25881600 | 2.50927500  | -1.58230300 |
| C  | -1.26560100 | 2.85105200  | 0.59239500  |
| C  | -3.71266100 | -1.04659200 | -2.32424500 |
| H  | -2.43989200 | 0.64316000  | -1.90086400 |
| C  | -3.25155900 | -3.07565500 | -1.09291400 |
| H  | -1.63472300 | -2.98739400 | 0.32429400  |
| C  | 1.97604400  | -0.90600500 | -1.83398200 |
| Zr | 3.30975000  | -0.64562900 | 1.22635100  |
| C  | -0.49394500 | 3.84909900  | -1.89758300 |
| H  | 0.21728300  | 1.85606300  | -2.31453300 |
| C  | -1.49915200 | 4.19000100  | 0.27296000  |
| H  | -1.56871100 | 2.47734400  | 1.57515100  |
| C  | -4.00239300 | -2.38107500 | -2.04266500 |
| H  | -4.30310900 | -0.50184500 | -3.06261500 |
| H  | -3.48636200 | -4.11587700 | -0.86202900 |
| C  | 3.33149800  | -1.22066100 | -2.43187600 |
| C  | 0.88987800  | -1.01131600 | -2.86418700 |
| C  | -1.10918000 | 4.68941000  | -0.96939600 |
| H  | -0.19614500 | 4.23676000  | -2.87313900 |
| H  | -1.98631300 | 4.84359500  | 0.99806400  |
| H  | -4.82291600 | -2.88145800 | -2.55883100 |
| H  | 3.54356300  | -0.54460300 | -3.27496700 |
| H  | 3.33265400  | -2.23926600 | -2.85320500 |
| H  | 4.14199500  | -1.13606200 | -1.69411500 |
| C  | 0.06648700  | -2.14228800 | -2.92227600 |
| C  | 0.76001700  | -0.03387000 | -3.85979700 |
| H  | -1.28957500 | 5.73633500  | -1.21677500 |
| C  | -0.88925800 | -2.27586000 | -3.92768000 |
| H  | 0.17190000  | -2.92530700 | -2.17044400 |
| C  | -0.21023400 | -0.15487500 | -4.85374200 |
| H  | 1.43311200  | 0.82803400  | -3.86069300 |

|   |             |             |             |
|---|-------------|-------------|-------------|
| C | -1.03782200 | -1.27707000 | -4.88843400 |
| H | -1.52613500 | -3.16147300 | -3.95238200 |
| H | -0.30879200 | 0.62212000  | -5.61313000 |
| H | -1.79005400 | -1.37755400 | -5.67195100 |
| C | 3.71243700  | -2.48107100 | 2.88123800  |
| C | 3.80630900  | -2.15942800 | 4.34557600  |
| C | 2.51503900  | -2.83419400 | 2.18428900  |
| C | 4.79260800  | -2.59382500 | 1.96264800  |
| H | 2.98300900  | -1.50786900 | 4.67318800  |
| H | 3.75904400  | -3.07817500 | 4.95021400  |
| H | 4.75177000  | -1.65609200 | 4.58836500  |
| C | 1.15900900  | -3.00908900 | 2.80074100  |
| C | 2.85379800  | -3.14235400 | 0.83847000  |
| C | 6.25217800  | -2.67312300 | 2.29177600  |
| C | 4.26009300  | -2.96014500 | 0.69029300  |
| H | 0.96977100  | -4.07475900 | 3.00255600  |
| H | 0.34875800  | -2.66312800 | 2.13966200  |
| H | 1.07052400  | -2.47668800 | 3.75721700  |
| C | 1.92546500  | -3.75659000 | -0.16109200 |
| H | 6.88437700  | -2.21275400 | 1.52154700  |
| H | 6.53464800  | -3.73714800 | 2.34271400  |
| H | 6.49431100  | -2.22519100 | 3.26087300  |
| C | 5.10462800  | -3.37424500 | -0.48126100 |
| H | 0.90075800  | -3.37344100 | -0.05111300 |
| H | 1.89291900  | -4.84790900 | -0.01524900 |
| H | 2.24369000  | -3.56020300 | -1.19244200 |
| H | 5.83374400  | -2.60428600 | -0.77220200 |
| H | 5.67575100  | -4.27952500 | -0.22186400 |
| H | 4.49254400  | -3.60914500 | -1.35944200 |
| C | 4.17756200  | 1.45459800  | 2.31334800  |
| C | 3.85734200  | 1.80376100  | 3.73673100  |
| C | 3.45435800  | 1.87912500  | 1.16088400  |
| C | 5.32843100  | 0.75079300  | 1.87851600  |
| H | 4.04452700  | 0.96323000  | 4.42073200  |
| H | 4.48593900  | 2.64399700  | 4.07133800  |
| H | 2.80849800  | 2.10617400  | 3.85014300  |
| C | 2.26514100  | 2.79034400  | 1.17701300  |
| C | 4.15533300  | 1.43154300  | 0.00606100  |

|   |             |             |             |
|---|-------------|-------------|-------------|
| C | 6.48957100  | 0.43774400  | 2.77404700  |
| C | 5.29906000  | 0.69509500  | 0.44688800  |
| H | 2.55872200  | 3.78371400  | 1.55026500  |
| H | 1.46317300  | 2.43222800  | 1.84164000  |
| H | 1.83836800  | 2.92109600  | 0.17522000  |
| C | 3.85782400  | 1.86209400  | -1.39828200 |
| H | 6.18472800  | -0.06184900 | 3.70373700  |
| H | 6.96943000  | 1.38603100  | 3.06380700  |
| H | 7.25025200  | -0.17472100 | 2.28008400  |
| C | 6.41689300  | 0.19974100  | -0.42703900 |
| H | 2.79520400  | 1.73798000  | -1.64929500 |
| H | 4.11230600  | 2.92719600  | -1.51251000 |
| H | 4.45494600  | 1.30206500  | -2.12760000 |
| H | 6.05870300  | -0.14736900 | -1.40597400 |
| H | 7.13916400  | 1.00962100  | -0.61422900 |
| H | 6.96929600  | -0.62512000 | 0.04275000  |
| C | 0.50622400  | 0.04482000  | 2.83480800  |
| O | -0.36091500 | 0.22455900  | 3.59057100  |
| O | 1.70499200  | -0.08551000 | 2.65276400  |

-----

**Zr<sup>+</sup>/Bi-Prod**

Free energy (M06-2X-D3/def2-TZVP) = -2038.410247

-----

|   |             |             |             |
|---|-------------|-------------|-------------|
| C | 0.11176000  | -0.17521800 | -0.67884300 |
| C | 0.14331000  | -0.39019200 | -2.00840500 |
| C | 0.41774000  | 0.75845800  | -2.95629000 |
| H | 1.37727600  | 0.59007100  | -3.47207600 |
| H | 0.45989400  | 1.72547900  | -2.43460700 |
| H | -0.34853600 | 0.81350200  | -3.74282600 |
| C | -0.04564600 | -1.70020400 | -2.70426300 |
| C | -0.41713600 | -4.15683500 | -4.01284600 |
| C | 0.81882100  | -2.77527800 | -2.46380700 |
| C | -1.08232100 | -1.86187600 | -3.63616300 |
| C | -1.26828000 | -3.08201500 | -4.28170600 |
| C | 0.62897900  | -4.00057100 | -3.10480800 |
| H | 1.66274500  | -2.64748800 | -1.78384600 |
| H | -1.75947900 | -1.03093600 | -3.84649600 |

|    |             |             |             |
|----|-------------|-------------|-------------|
| H  | -2.08371600 | -3.19634900 | -4.99724500 |
| H  | 1.31130500  | -4.82704800 | -2.89946300 |
| H  | -0.56330800 | -5.11074700 | -4.52105800 |
| Bi | -0.34077600 | -1.97971400 | 0.65679500  |
| C  | 1.00007400  | -3.76745500 | 0.68335700  |
| C  | 2.55873200  | -6.07559000 | 0.66714700  |
| C  | 2.39202000  | -3.66402800 | 0.73254600  |
| C  | 0.38240700  | -5.01797200 | 0.63409200  |
| C  | 1.16910600  | -6.17219300 | 0.62737300  |
| C  | 3.16937100  | -4.82241900 | 0.72165000  |
| H  | 2.89257500  | -2.69522600 | 0.77859200  |
| H  | -0.70542400 | -5.10986200 | 0.59800200  |
| H  | 0.68753000  | -7.15036200 | 0.59129200  |
| H  | 4.25664100  | -4.74279400 | 0.75953200  |
| H  | 3.16940100  | -6.97923200 | 0.66036800  |
| C  | -2.29117300 | -2.96436500 | 0.29454000  |
| C  | -4.75195800 | -4.19842000 | -0.06949500 |
| C  | -2.55913000 | -3.61620600 | -0.91070100 |
| C  | -3.23204900 | -2.93922000 | 1.32738700  |
| C  | -4.46790800 | -3.55998400 | 1.13779600  |
| C  | -3.79967700 | -4.23088300 | -1.08850400 |
| H  | -1.81305000 | -3.66263400 | -1.70642200 |
| H  | -3.00993400 | -2.45237600 | 2.28127600  |
| H  | -5.20712800 | -3.54810900 | 1.93987300  |
| H  | -4.01780500 | -4.74012300 | -2.02854100 |
| H  | -5.71933200 | -4.68132200 | -0.21381200 |
| Zr | 0.29572200  | 1.68782600  | 0.68096800  |
| C  | 2.72897500  | 1.15961700  | 0.09178600  |
| C  | 2.58880500  | 1.09122900  | 1.50496300  |
| C  | 2.29743900  | 2.40169700  | 1.99175700  |
| C  | 2.27604700  | 3.28282200  | 0.87316900  |
| C  | 2.50244600  | 2.51082800  | -0.30549900 |
| C  | -1.13859800 | 3.50380800  | -0.37398000 |
| C  | -1.11045100 | 3.76128200  | 1.03597700  |
| C  | -1.77888000 | 2.69169900  | 1.69212700  |
| C  | -2.23079100 | 1.77971600  | 0.69872300  |
| C  | -1.86413700 | 2.29459800  | -0.57754000 |
| C  | -2.39453300 | 1.77625700  | -1.87938400 |

|   |             |             |             |
|---|-------------|-------------|-------------|
| H | -1.92884400 | 2.27350300  | -2.73828400 |
| H | -3.47594900 | 1.97827500  | -1.92896500 |
| H | -2.25590600 | 0.69064800  | -1.98052300 |
| C | -3.07229000 | 0.56146100  | 0.92397200  |
| H | -2.85656500 | 0.08084200  | 1.88966300  |
| H | -2.94087400 | -0.17821500 | 0.12033100  |
| H | -4.14110500 | 0.82837700  | 0.93932800  |
| C | -2.02868800 | 2.60062100  | 3.16830600  |
| H | -1.19121100 | 3.01315500  | 3.74851000  |
| H | -2.17872000 | 1.56314100  | 3.49365700  |
| H | -2.92954900 | 3.17511500  | 3.43524600  |
| C | -0.73774200 | 5.04792600  | 1.71270900  |
| H | -0.19265200 | 5.72473100  | 1.04661100  |
| H | -0.13666100 | 4.89241100  | 2.61947600  |
| H | -1.65912800 | 5.56420000  | 2.02434900  |
| C | -0.72266800 | 4.45827000  | -1.45689700 |
| H | 0.10117000  | 5.11012200  | -1.13875700 |
| H | -1.56542600 | 5.11121200  | -1.73275200 |
| H | -0.40556400 | 3.93463200  | -2.37005100 |
| C | 2.74559500  | 3.09653600  | -1.66762000 |
| H | 3.69392000  | 3.65680400  | -1.66869200 |
| H | 1.95612300  | 3.79828700  | -1.97184400 |
| H | 2.82234600  | 2.31793300  | -2.43609800 |
| C | 2.34542000  | 4.77933100  | 0.91050700  |
| H | 3.39998500  | 5.07984700  | 0.80148000  |
| H | 1.98432500  | 5.19528900  | 1.85692900  |
| H | 1.79341100  | 5.24895900  | 0.08643700  |
| C | 2.12253400  | 2.77297000  | 3.43694200  |
| H | 3.09448100  | 2.79800000  | 3.95287800  |
| H | 1.48453900  | 2.04854600  | 3.96397400  |
| H | 1.66868200  | 3.76701000  | 3.54530500  |
| C | 2.80572000  | -0.12747100 | 2.34994300  |
| H | 2.30160500  | -1.01582800 | 1.93840900  |
| H | 2.42595700  | 0.01742700  | 3.36902700  |
| H | 3.87819300  | -0.36733600 | 2.41660300  |
| C | 3.23235300  | 0.05071500  | -0.77980800 |
| H | 4.33372700  | 0.05042000  | -0.78312300 |
| H | 2.89059600  | 0.15023600  | -1.81733000 |



|   |             |             |             |
|---|-------------|-------------|-------------|
| H | 2.89763800  | -0.93035600 | -0.41736900 |
| C | -0.49539100 | -0.73189700 | 2.65203700  |
| O | -0.07220800 | 0.42459300  | 2.35051300  |
| O | -0.94632900 | -1.20877500 | 3.64051300  |

---

CO2

Free energy (M06-2X-D3/def2-TZVP) = -188.379677 Hartree

---

|   |             |            |             |
|---|-------------|------------|-------------|
| O | -0.28202800 | 0.00000000 | 0.98993800  |
| C | 0.38551800  | 0.00000000 | 0.04590800  |
| O | 1.05306300  | 0.00000000 | -0.89812100 |
